# Supplementary material
Source: PubMed Central journal article supplement (PMC3480531)

Figure E1

Regent Controls

Bronchoscope  
Pre-wash

Oropharyngeal  
wash

Bronchoalveolar  
Lavage

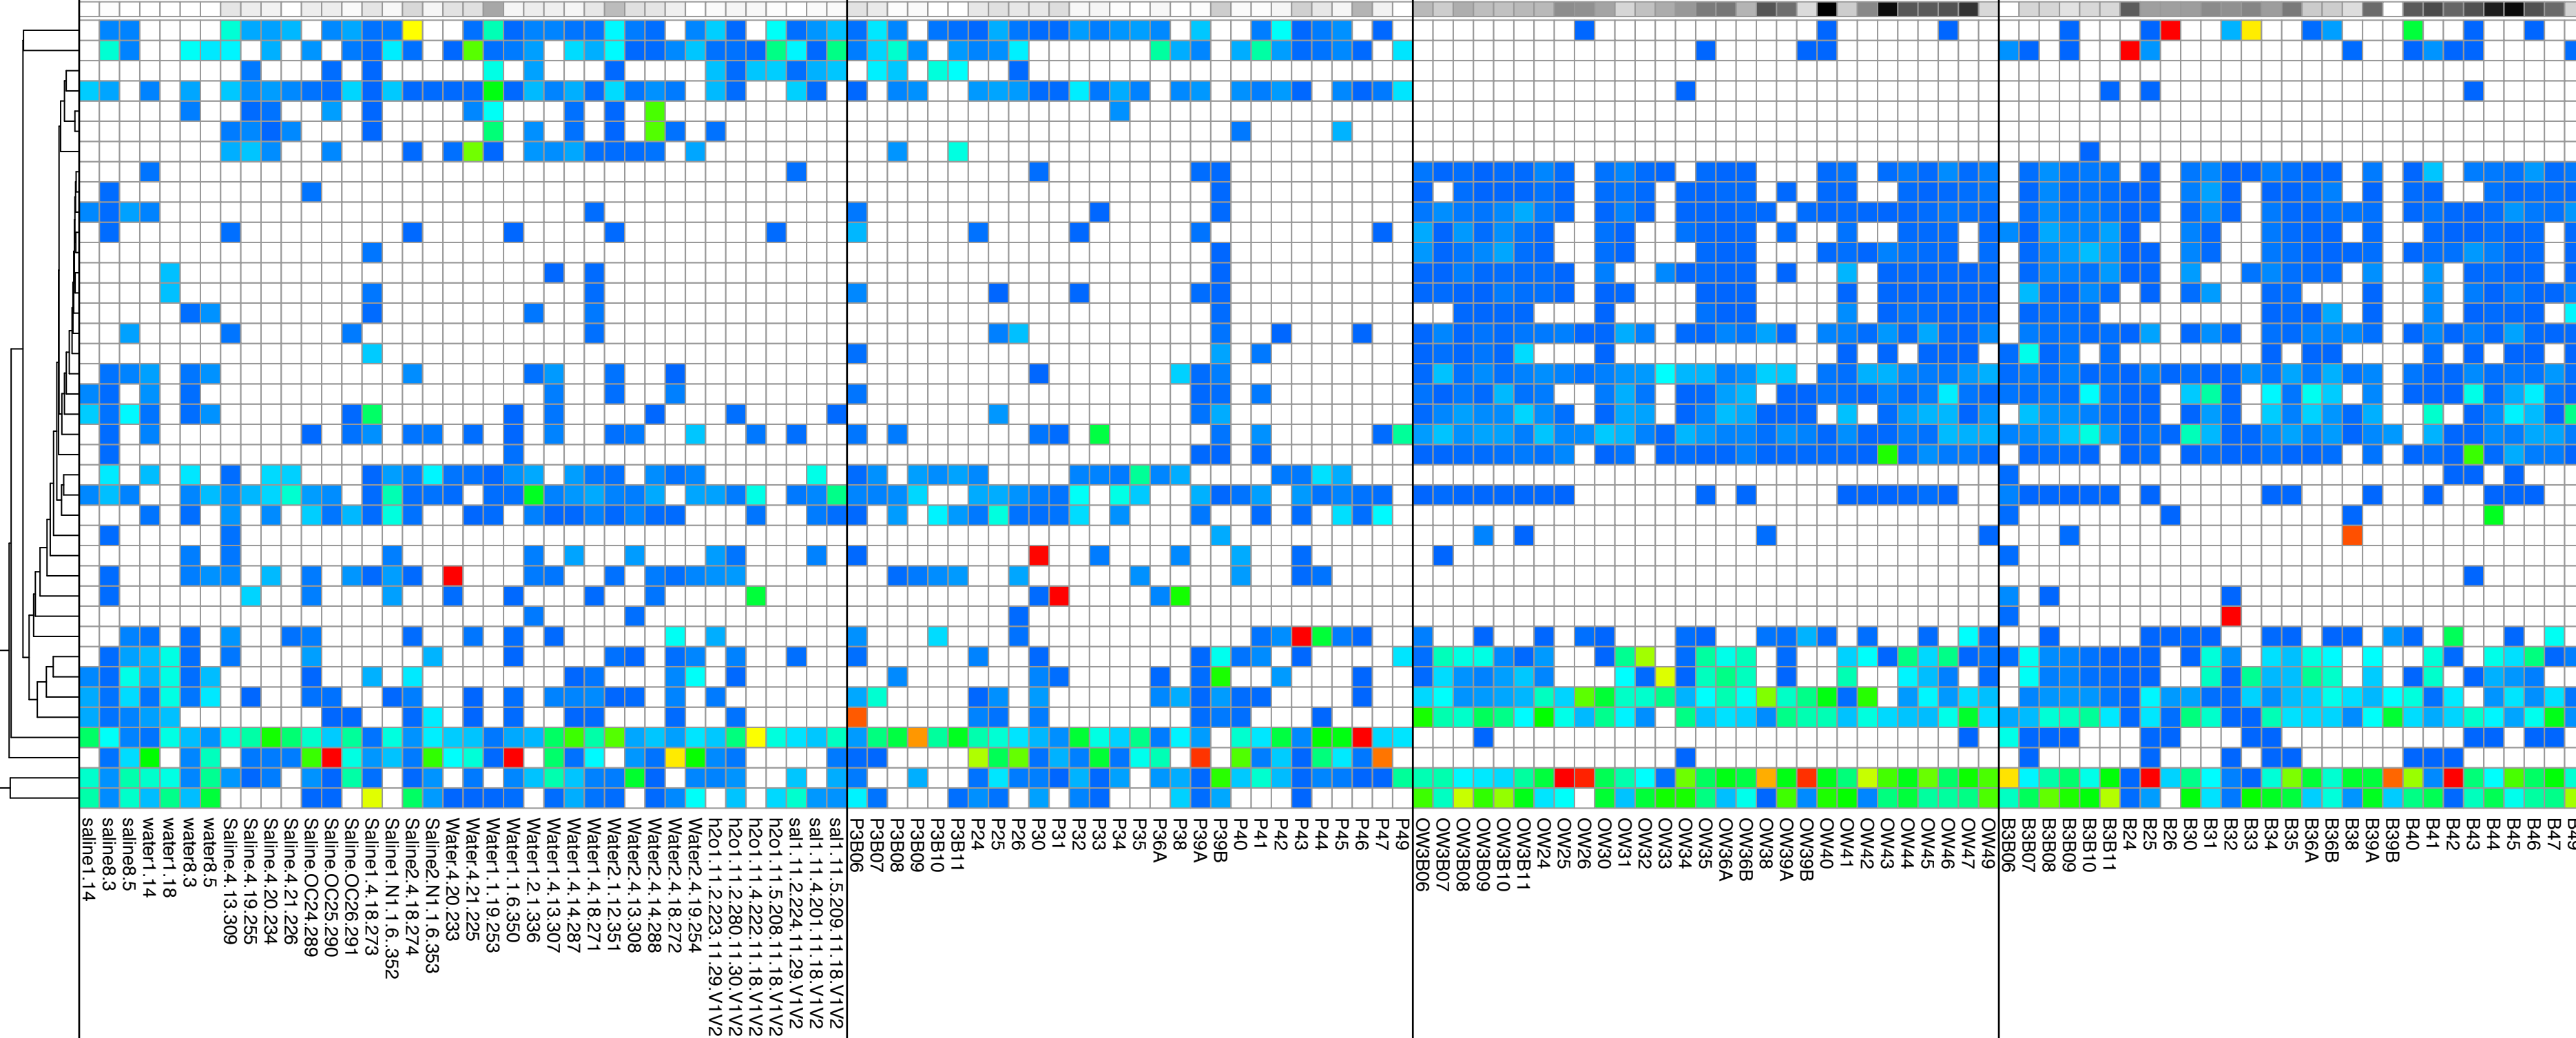

- Proteobacteria Pseudomonas
- Firmicutes Staphylococcus
- Proteobacteria Delftia
- Proteobacteria Acinetobacter
- Proteobacteria Massilia
- Proteobacteria Duganella
- Proteobacteria Roseateles
- Firmicutes Oribacterium
- Firmicutes Moryella
- Proteobacteria Campylobacter
- Firmicutes Megasphaera
- Actinobacteria Atopobium
- Firmicutes Solobacterium
- Firmicutes Selenomonas
- Firmicutes Parvimonas
- Firmicutes Gemella
- Spirochaetes Treponema
- Firmicutes Granulicatella
- Fusobacteria Leptotrichia
- Fusobacteria Fusobacterium
- Actinobacteria Actinomyces
- Bacteroidetes Capnocytophaga
- Proteobacteria Diaphorobacter
- Actinobacteria Corynebacterium
- Proteobacteria Burkholderia
- Fusobacteria Sneathia
- Firmicutes Lactococcus
- Actinobacteria Micrococcus
- Firmicutes Geobacillus
- Proteobacteria Achromobacter
- Firmicutes Lactobacillus
- Proteobacteria Neisseria
- Bacteroidetes Porphyromonas
- Actinobacteria Rothia
- Firmicutes Veillonella
- Actinobacteria Propionibacterium
- Proteobacteria Methylobacterium
- Firmicutes Streptococcus
- Bacteroidetes Prevotella

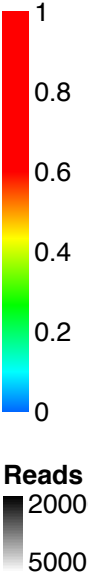

saline1.14  
saline8.3  
saline8.5  
water1.14  
water1.18  
water8.3  
water8.5  
Saline.4.13.309  
Saline.4.19.255  
Saline.4.20.234  
Saline.4.21.226  
Saline.OC24.289  
Saline.OC25.290  
Saline.OC26.291  
Saline1.4.18.273  
Saline1.N1.1.6.352  
Saline2.4.18.274  
Saline2.N1.1.6.353  
Water.4.20.233  
Water.4.21.225  
Water1.1.19.253  
Water1.1.6.350  
Water1.2.1.336  
Water1.4.13.307  
Water1.4.14.287  
Water1.4.18.271  
Water2.1.12.351  
Water2.4.13.308  
Water2.4.14.288  
Water2.4.18.272  
Water2.4.19.254  
h2o1.11.2.223.11.29.V1V2  
h2o1.11.4.222.11.18.V1V2  
h2o1.11.5.208.11.18.V1V2  
h2o1.11.2.224.11.29.V1V2  
h2o1.11.2.224.11.18.V1V2  
sal1.11.5.209.11.18.V1V2  
sal1.11.4.201.11.18.V1V2  
P3B06  
P3B07  
P3B08  
P3B09  
P3B10  
P3B11  
P24  
P25  
P26  
P30  
P31  
P32  
P33  
P34  
P35  
P36A  
P38  
P39A  
P39B  
P40  
P41  
P42  
P43  
P44  
P45  
P46  
P47  
P49  
OW3B06  
OW3B07  
OW3B08  
OW3B09  
OW3B10  
OW3B11  
OW24  
OW25  
OW26  
OW30  
OW31  
OW32  
OW33  
OW34  
OW35  
OW36A  
OW36B  
OW38  
OW39A  
OW39B  
OW40  
OW41  
OW42  
OW43  
OW44  
OW45  
OW46  
OW47  
OW49  
B3B06  
B3B07  
B3B08  
B3B09  
B3B10  
B3B11  
B24  
B25  
B26  
B30  
B31  
B32  
B33  
B34  
B35  
B36A  
B36B  
B38  
B39A  
B39B  
B40  
B41  
B42  
B43  
B44  
B45  
B46  
B47  
B49

Figure E2

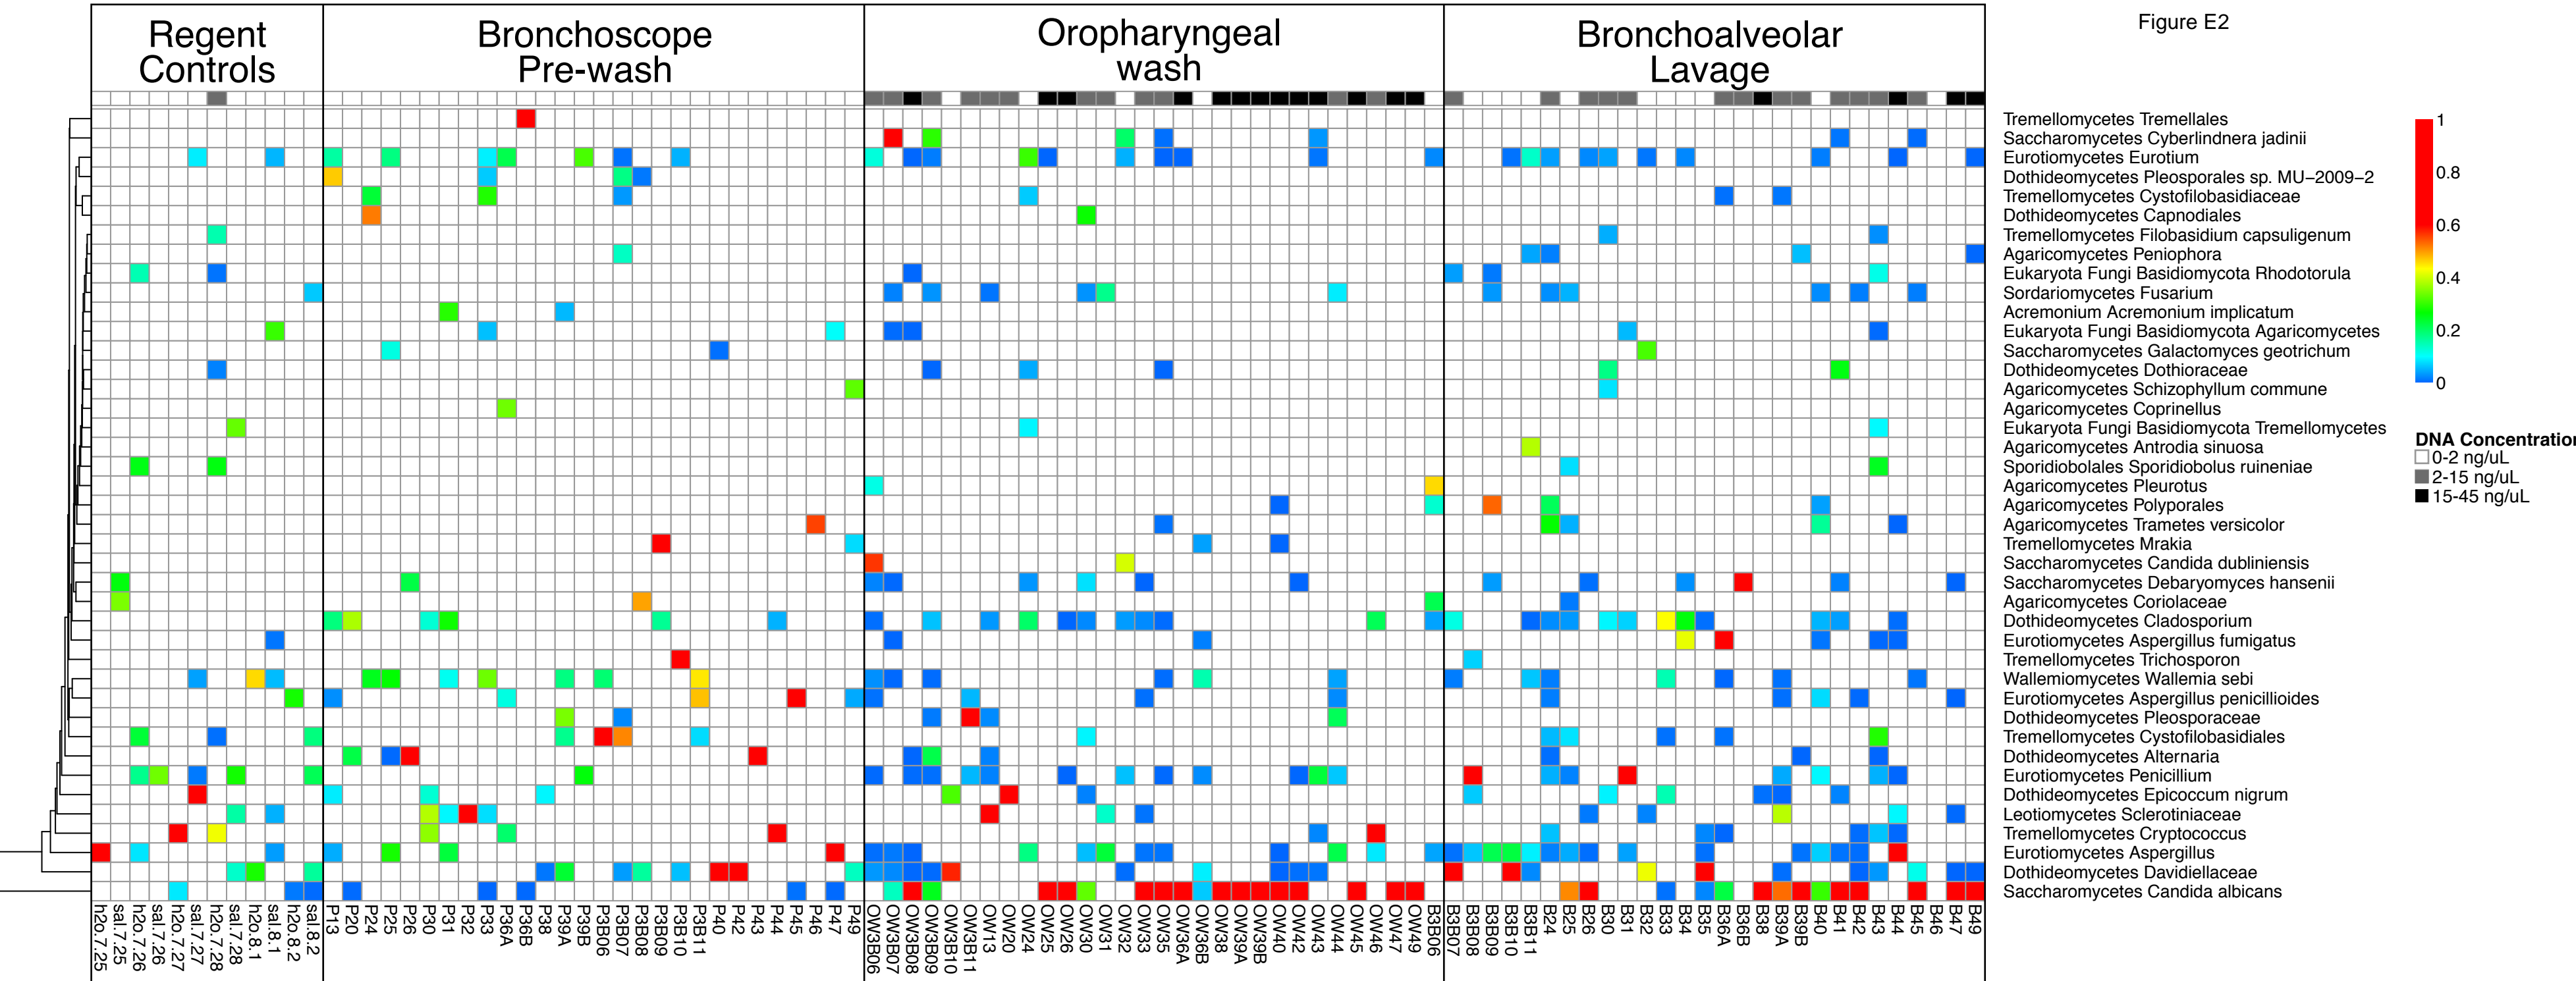

Within-Subject BAL-OW  
Distance

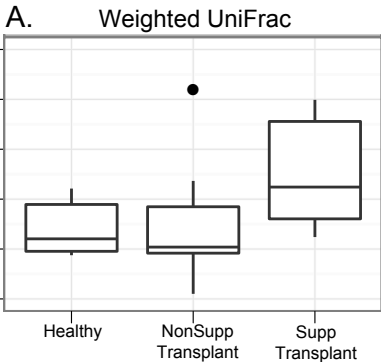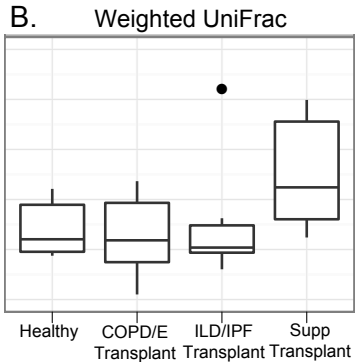

Supplement: supp_186.6.536_Charlson_ODS_fig_E1-E3.pdf [file supp_186.6.536_Charlson_ODS_fig_E1-E3.pdf]
