# Supplementary material
Source: PubMed Central journal article supplement (PMC3480531)
Supplement: supp_186.6.536_Charlson_ODS_table_E1.pdf [file supp_186.6.536_Charlson_ODS_table_E1.pdf]

Table E1

| Subject | Sample | Tx Type    | Pre Tx Dx     | Months post Tx | Bronch Indication   | Immuno-suppression               | Antimicrobials                         | BAL Bacterial Culture                                   | Bacterial sequences in BAL / %                                                                         | BAL Culture Oral Flora | BAL Fungal Culture                                              | Fungal sequences in BAL / %                                                 | BAL ITS (ng) | OW ITS (ng) |
|---------|--------|------------|---------------|----------------|---------------------|----------------------------------|----------------------------------------|---------------------------------------------------------|--------------------------------------------------------------------------------------------------------|------------------------|-----------------------------------------------------------------|-----------------------------------------------------------------------------|--------------|-------------|
| Tx24    | 24     | SLT-L      | IPF           | 2              | Routine             | MMF, Pred, Tac                   | TMP/S, Valcyc, Nystatin                | <i>Staphylococcus aureus</i>                            | <i>Staphylococcus aureus</i> 98%                                                                       | Yes                    | None                                                            | <i>Trametes versicolor</i> 24%                                              | 2.2          | 1.3         |
| Tx25    | 25     | BLT        | A1AT          | 6              | Routine / early BOS | MMF, Pred, Tac                   | Azithro, TMP/S, Valgan, Nystatin       | None                                                    | <i>Streptococcus</i> spp. 45%                                                                          | Yes                    | None                                                            | <i>Ascomycota</i> unknown 36%,<br><i>Candida albicans</i> 22%               | 2.0          | 36.1        |
| Tx26    | 26     | BLT        | CF            | 9              | Routine             | Pred, Tac                        | TMP/S, Valcyc                          | <i>Pseudomonas aeruginosa</i>                           | <i>Pseudomonas aeruginosa</i> 88%                                                                      | No                     | None                                                            | <i>Candida albicans</i> 88%                                                 | 2.4          | 29.2        |
| Tx30    | 30     | SLT-L      | IPF           | 15             | Routine             | Aza, Pred, Tac                   | TMP/S, Valgan                          | None                                                    | <i>Prevotella</i> ,<br><i>Veillonella</i> spp. 16%                                                     | Yes                    | None                                                            | <i>Aureobasidium pullulans</i> 17%                                          | 4.5          | 4.4         |
| Tx31    | 31     | BLT, Heart | CHD, PHTN     | 5              | Routine             | MMF, Pred, Tac                   | TMP/S, Valcyc                          | None                                                    | <i>Leptotrichia</i> spp. 14%                                                                           | Yes                    | None                                                            | <i>Penicillium</i> spp. 59%                                                 | 9.3          | 5.2         |
| Tx32    | 32     | BLT        | CF            | 2              | Routine             | Aza, Pred, Tac                   | TMP/S, Valgan                          | <i>Achromobacter</i> ,<br><i>Pseudomonas aeruginosa</i> | <i>Achromobacter</i> 83%,<br><i>Pseudomonas aeruginosa</i> 5%                                          | Yes                    | None                                                            | <i>Davidiellaceae</i> spp. 42%                                              | 0.9          | 1.7         |
| Tx33    | 33     | BLT        | CF            | 9              | non-resolving PNA   | Aza, Pred, Tac                   | Levofloxacin, Meropenem, Valcyc, Tobra | <i>Pseudomonas aeruginosa</i>                           | <i>Pseudomonas aeruginosa</i> 44%                                                                      | No                     | None                                                            | <i>Cladosporium</i> spp. 43%                                                | 1.3          | 4.1         |
| Tx34    | 34     | BLT        | A1AT          | 4              | Routine             | MMF, Pred, Tac                   | TMP/S, Valgan, Vori                    | None                                                    | <i>Veillonella</i> 14%                                                                                 | Yes                    | None                                                            | <i>Aspergillus fumigatus</i> 42%                                            | 0.7          | 3.2         |
| Tx35    | 35     | BLT        | PCD           | 12             | Routine             | MMF, Pred, Tac                   | TMP/S                                  | <i>Mycobacterium avium-intracellulare</i>               | <i>Streptococcus</i> spp. 29%                                                                          | Yes                    | <i>Candida albicans</i>                                         | <i>Davidiellaceae</i> spp. 82%<br>( <i>Candida albicans</i> 1.9%)           | 1.5          | 6.4         |
| Tx36    | 36A    | SLT-L      | IPF           | 2              | Routine             | MMF, Pred, Tac                   | TMP/S, Valgan                          | <i>Pseudomonas aeruginosa</i>                           | <i>Streptococcus</i> spp. 17%<br>( <i>Pseudomonas aeruginosa</i> 0.35%)                                | No                     | <i>Aspergillus flavus</i> ,<br><i>Candida albicans</i>          | <i>Aspergillus fumigatus</i> 76%,<br><i>Candida albicans</i> 22%            | 5.9          | 41.5        |
|         | 36B    |            |               | 4              | Routine             | MMF, Pred, Tac                   | TMP/S, Valgan, Vori, Nystatin          | <i>Klebsiella oxytoca</i>                               | <i>Porphyromonas</i> spp. 11%,<br><i>Rothia</i> spp. 10%<br>( <i>Enterobacteriaceae</i> spp. 0.02% )   | Yes                    | None                                                            | <i>Myrmecridium schulzeri</i> 52%                                           | 2.2          | 1.8         |
| Tx38    | 38     | BLT        | CF            | 114            | Late BOS            | Pred, TAC                        | Azithro, TMP/S, Ciprofloxacin          | None                                                    | <i>Sneathia</i> spp. 53%                                                                               | Yes                    | <i>Candida albicans</i>                                         | <i>Candida albicans</i> 99%                                                 | 36.4         | 37.9        |
| Tx39    | 39A    | BLT        | COPD          | 2              | Routine             | Aza, Pred, Tac                   | TMP/S, Valgan                          | None                                                    | <i>Streptococcus</i> spp. 11%                                                                          | Yes                    | <i>Candida albicans</i>                                         | <i>Candida albicans</i> 52%                                                 | 5.0          | 41.3        |
|         | 39B    |            |               | 4              | Routine             | Aza, Pred, Tac                   | TMP/S, Valgan                          | None                                                    | <i>Streptococcus</i> spp. 23%,<br><i>Veillonella</i> spp. 23%                                          | Yes                    | <i>Candida albicans</i>                                         | <i>Candida albicans</i> 83%                                                 | 6.0          | 42.5        |
| Tx40    | 40     | BLT        | CF            | 18             | Routine / early BOS | MMF, CSA, Pred, pulse Methylpred | Azithro, TMP/S                         | <i>Pseudomonas aeruginosa</i>                           | <i>Streptococcus</i> spp. 24%,<br><i>Pseudomonas aeruginosa</i> 23%                                    | Yes                    | None                                                            | <i>Candida albicans</i> 29%                                                 | 0.5          | 38.5        |
| Tx41    | 41     | BLT, Heart | Sarcoid, PHTN | 1              | Routine             | MMF, Pred, Tac                   | TMP/S, Valcyc, Nystatin                | <i>Staphylococcus aureus</i>                            | <i>Lactobacillus</i> 24%,<br><i>Streptococcus</i> spp. 15%<br>( <i>Staphylococcus aureus</i> 0.11%)    | yes                    | <i>Candida albicans</i>                                         | <i>Candida albicans</i> 99.98%                                              | 24.2         | na          |
| Tx42    | 42     | SLT-L      | COPD          | 3              | Routine             | MMF, Pred, Tac                   | Atovaquone, Valgan                     | None                                                    | <i>Streptococcus</i> spp. 41%                                                                          | Yes                    | <i>Candida albicans</i>                                         | <i>Candida albicans</i> 96%                                                 | 3.0          | 35.5        |
| Tx43    | 43     | BLT        | COPD          | 5              | Routine             | Aza, Pred, Tac                   | TMP/S, Valcyc, Vori                    | None                                                    | <i>Capnocytophaga</i> spp. 28%                                                                         | Yes                    | None                                                            | <i>Cystofilobasidiales</i> spp. 25%,<br><i>Sporidiobolus ruineniae</i> 23%  | 8.0          | 20.9        |
| Tx44    | 44     | BLT        | Sarcoid, PHTN | 12             | Routine             | MMF, Pred, Tac                   | TMP/S                                  | <i>Burkholderia cepacia</i>                             | <i>Burkholderia</i> spp. 23%                                                                           | No                     | <i>Aspergillus fumigatus</i> ,<br><i>Paecilomyces lilacinus</i> | <i>Aspergillus flavus</i> 88%,<br>( <i>Purpureocillium lilacinum</i> 0.28%) | 20.0         | 10.6        |
| Tx45    | 45     | BLT        | ILD           | 4              | Routine             | MMF, Pred, Tac                   | TMP/S, Nystatin                        | <i>Mycobacterium avium-intracellulare</i>               | <i>Streptococcus</i> spp. 22%                                                                          | Yes                    | <i>Candida albicans</i>                                         | <i>Candida albicans</i> 83%                                                 | 6.2          | 42.8        |
| Tx46    | 46     | BLT        | COPD          | 4              | Routine             | Aza, Pred, Tac                   | Valgan                                 | <i>Pseudomonas aeruginosa</i>                           | <i>Streptococcus</i> spp. 17%,<br><i>Neisseria</i> spp. 16%<br>( <i>Pseudomonas aeruginosa</i> 0.011%) | Yes                    | None                                                            | <i>Chaetomium</i> spp. 99%                                                  | 1.7          | 5.4         |
| Tx47    | 47     | BLT        | COPD          | 2              | Routine             | Aza, Pred, Tac                   | TMP/S, Valgan, Nystatin                | <i>Enterobacter cloacae</i>                             | <i>Veillonella</i> spp. 24%<br>( <i>Enterobacteriaceae</i> spp. 0.41%)                                 | No                     | <i>Candida albicans</i>                                         | <i>Candida albicans</i> 99.6%                                               | 42.2         | 41.6        |
| Tx49    | 49     | BLT        | ILD           | 2              | Routine             | MMF, Pred, Tac                   | TMP/S, Valgan                          | None                                                    | <i>Prevotella</i> spp. 21%                                                                             | Yes                    | <i>Candida albicans</i>                                         | <i>Candida albicans</i> 99.6%                                               | 36.6         | 43.2        |
