# Supplementary material
Source: PubMed Central journal article supplement (PMC3480531)
Supplement: supp_186.6.536_Charlson_ODS_table_E2.pdf [file supp_186.6.536_Charlson_ODS_table_E2.pdf]

|     |   |   |   |    |    |   |   |     |     |   |    |     |   |    |   |     |
|-----|---|---|---|----|----|---|---|-----|-----|---|----|-----|---|----|---|-----|
| 358 | 0 | 0 | 0 | 0  | 0  | 0 | 0 | 0   | 0   | 0 | 0  | 0   | 0 | 0  | 0 | 0   |
| 359 | 0 | 0 | 0 | 0  | 0  | 0 | 0 | 0   | 0   | 0 | 0  | 0   | 0 | 0  | 0 | 0   |
| 360 | 0 | 0 | 0 | 0  | 0  | 0 | 0 | 0   | 0   | 0 | 0  | 0   | 0 | 0  | 0 | 0   |
| 362 | 0 | 0 | 0 | 0  | 0  | 0 | 0 | 0   | 0   | 0 | 0  | 0   | 0 | 0  | 0 | 0   |
| 365 | 0 | 0 | 0 | 0  | 0  | 0 | 0 | 0   | 0   | 0 | 0  | 0   | 0 | 0  | 0 | 1   |
| 366 | 0 | 0 | 0 | 0  | 0  | 0 | 0 | 0   | 0   | 0 | 0  | 0   | 0 | 0  | 0 | 0   |
| 367 | 0 | 0 | 0 | 0  | 0  | 0 | 0 | 0   | 0   | 0 | 0  | 0   | 0 | 0  | 0 | 0   |
| 370 | 0 | 0 | 0 | 0  | 0  | 0 | 0 | 0   | 0   | 0 | 0  | 0   | 0 | 0  | 0 | 0   |
| 371 | 0 | 0 | 0 | 0  | 0  | 0 | 0 | 0   | 0   | 0 | 0  | 0   | 0 | 0  | 0 | 0   |
| 372 | 0 | 0 | 0 | 0  | 0  | 0 | 0 | 0   | 0   | 0 | 0  | 0   | 0 | 0  | 0 | 0   |
| 373 | 0 | 0 | 0 | 0  | 0  | 0 | 0 | 0   | 0   | 0 | 0  | 0   | 0 | 0  | 0 | 0   |
| 375 | 0 | 0 | 0 | 0  | 11 | 0 | 0 | 0   | 0   | 0 | 0  | 0   | 0 | 0  | 0 | 0   |
| 376 | 0 | 0 | 0 | 0  | 0  | 0 | 0 | 0   | 0   | 0 | 0  | 0   | 0 | 0  | 0 | 0   |
| 377 | 0 | 0 | 0 | 0  | 0  | 0 | 0 | 0   | 0   | 0 | 0  | 0   | 0 | 0  | 0 | 0   |
| 379 | 0 | 0 | 0 | 0  | 0  | 0 | 0 | 0   | 0   | 0 | 0  | 0   | 0 | 0  | 0 | 0   |
| 382 | 1 | 1 | 0 | 44 | 0  | 0 | 0 | 49  | 117 | 0 | 0  | 51  | 0 | 17 | 0 | 212 |
| 383 | 0 | 0 | 0 | 0  | 0  | 0 | 0 | 0   | 0   | 0 | 0  | 0   | 0 | 0  | 0 | 0   |
| 385 | 0 | 0 | 0 | 0  | 0  | 0 | 0 | 0   | 0   | 0 | 0  | 0   | 0 | 0  | 0 | 1   |
| 386 | 0 | 0 | 0 | 0  | 0  | 0 | 0 | 0   | 0   | 0 | 0  | 0   | 0 | 0  | 0 | 0   |
| 389 | 0 | 0 | 0 | 0  | 0  | 0 | 0 | 0   | 0   | 0 | 0  | 0   | 0 | 0  | 0 | 0   |
| 392 | 0 | 0 | 0 | 0  | 0  | 0 | 0 | 0   | 0   | 0 | 0  | 0   | 0 | 0  | 0 | 0   |
| 393 | 0 | 0 | 0 | 0  | 0  | 0 | 0 | 0   | 0   | 0 | 0  | 0   | 0 | 0  | 0 | 0   |
| 395 | 0 | 0 | 0 | 0  | 0  | 0 | 0 | 0   | 0   | 0 | 0  | 0   | 0 | 0  | 0 | 0   |
| 396 | 0 | 0 | 0 | 0  | 0  | 0 | 0 | 0   | 0   | 0 | 0  | 0   | 0 | 0  | 0 | 0   |
| 397 | 0 | 0 | 0 | 0  | 0  | 0 | 0 | 0   | 0   | 0 | 0  | 0   | 0 | 0  | 0 | 0   |
| 398 | 0 | 0 | 0 | 0  | 0  | 0 | 0 | 0   | 0   | 0 | 0  | 0   | 0 | 0  | 0 | 0   |
| 400 | 0 | 0 | 0 | 0  | 0  | 0 | 0 | 0   | 0   | 0 | 0  | 0   | 0 | 0  | 0 | 0   |
| 403 | 0 | 0 | 0 | 0  | 0  | 0 | 0 | 0   | 0   | 0 | 0  | 0   | 0 | 0  | 0 | 0   |
| 405 | 0 | 0 | 0 | 0  | 0  | 0 | 0 | 160 | 30  | 0 | 0  | 103 | 0 | 1  | 0 | 0   |
| 407 | 0 | 0 | 0 | 0  | 0  | 0 | 0 | 0   | 0   | 0 | 0  | 0   | 0 | 0  | 0 | 0   |
| 408 | 0 | 0 | 0 | 0  | 0  | 0 | 0 | 0   | 0   | 0 | 0  | 0   | 0 | 0  | 0 | 0   |
| 409 | 0 | 0 | 0 | 0  | 0  | 0 | 0 | 0   | 0   | 0 | 0  | 0   | 0 | 0  | 0 | 0   |
| 410 | 0 | 0 | 0 | 0  | 0  | 0 | 0 | 0   | 4   | 0 | 0  | 0   | 0 | 0  | 0 | 0   |
| 411 | 0 | 0 | 0 | 0  | 0  | 0 | 0 | 0   | 0   | 0 | 0  | 0   | 0 | 0  | 0 | 0   |
| 413 | 0 | 0 | 0 | 0  | 0  | 0 | 0 | 0   | 0   | 0 | 0  | 0   | 0 | 0  | 0 | 0   |
| 414 | 0 | 0 | 0 | 0  | 0  | 0 | 0 | 0   | 0   | 0 | 0  | 0   | 0 | 0  | 0 | 0   |
| 416 | 0 | 0 | 0 | 0  | 0  | 0 | 0 | 0   | 0   | 0 | 0  | 0   | 0 | 0  | 0 | 0   |
| 417 | 0 | 0 | 0 | 0  | 0  | 0 | 0 | 0   | 0   | 0 | 0  | 0   | 0 | 0  | 0 | 0   |
| 419 | 0 | 0 | 0 | 0  | 0  | 0 | 0 | 0   | 0   | 0 | 0  | 0   | 0 | 0  | 0 | 0   |
| 420 | 0 | 0 | 0 | 0  | 0  | 0 | 0 | 0   | 0   | 0 | 0  | 0   | 0 | 0  | 0 | 0   |
| 421 | 0 | 0 | 0 | 0  | 0  | 0 | 0 | 0   | 0   | 0 | 0  | 0   | 0 | 0  | 0 | 0   |
| 422 | 0 | 0 | 0 | 0  | 0  | 0 | 0 | 0   | 0   | 0 | 0  | 0   | 0 | 0  | 0 | 0   |
| 423 | 0 | 0 | 0 | 0  | 0  | 0 | 0 | 0   | 0   | 0 | 0  | 0   | 0 | 0  | 0 | 0   |
| 424 | 0 | 0 | 0 | 0  | 0  | 0 | 0 | 0   | 36  | 0 | 0  | 0   | 0 | 0  | 0 | 0   |
| 425 | 0 | 0 | 0 | 0  | 0  | 0 | 0 | 0   | 0   | 0 | 0  | 0   | 0 | 0  | 0 | 0   |
| 429 | 0 | 0 | 0 | 0  | 0  | 0 | 0 | 0   | 0   | 0 | 0  | 0   | 0 | 0  | 0 | 0   |
| 431 | 0 | 0 | 0 | 0  | 0  | 0 | 0 | 0   | 0   | 0 | 0  | 0   | 0 | 0  | 0 | 0   |
| 432 | 0 | 1 | 0 | 0  | 0  | 0 | 0 | 0   | 0   | 0 | 0  | 0   | 0 | 0  | 0 | 1   |
| 433 | 0 | 0 | 0 | 0  | 0  | 0 | 0 | 0   | 0   | 0 | 0  | 0   | 0 | 0  | 0 | 0   |
| 434 | 0 | 0 | 0 | 0  | 0  | 0 | 0 | 0   | 0   | 0 | 0  | 0   | 0 | 0  | 0 | 0   |
| 439 | 0 | 0 | 0 | 0  | 0  | 0 | 0 | 0   | 0   | 0 | 0  | 0   | 0 | 0  | 0 | 0   |
| 441 | 0 | 0 | 0 | 0  | 0  | 0 | 0 | 0   | 0   | 0 | 0  | 0   | 0 | 0  | 0 | 0   |
| 443 | 0 | 0 | 0 | 0  | 0  | 0 | 0 | 0   | 0   | 0 | 0  | 0   | 0 | 0  | 0 | 0   |
| 444 | 0 | 0 | 0 | 0  | 0  | 0 | 0 | 0   | 0   | 0 | 0  | 0   | 0 | 0  | 0 | 0   |
| 446 | 0 | 0 | 0 | 0  | 0  | 0 | 0 | 0   | 0   | 0 | 0  | 0   | 0 | 0  | 0 | 0   |
| 447 | 0 | 0 | 0 | 0  | 0  | 0 | 0 | 0   | 0   | 0 | 0  | 0   | 0 | 0  | 0 | 0   |
| 448 | 0 | 0 | 0 | 0  | 0  | 0 | 0 | 0   | 0   | 0 | 0  | 0   | 0 | 0  | 0 | 0   |
| 450 | 0 | 0 | 0 | 0  | 0  | 0 | 0 | 0   | 0   | 0 | 0  | 0   | 0 | 0  | 0 | 0   |
| 451 | 0 | 0 | 0 | 0  | 0  | 0 | 0 | 0   | 0   | 0 | 0  | 0   | 0 | 0  | 0 | 0   |
| 452 | 0 | 0 | 0 | 0  | 0  | 0 | 0 | 0   | 0   | 0 | 0  | 0   | 0 | 0  | 0 | 0   |
| 454 | 0 | 0 | 0 | 0  | 0  | 0 | 0 | 0   | 0   | 0 | 0  | 0   | 0 | 0  | 0 | 0   |
| 455 | 0 | 0 | 0 | 0  | 0  | 0 | 0 | 0   | 0   | 0 | 0  | 0   | 0 | 0  | 0 | 0   |
| 456 | 0 | 0 | 0 | 0  | 0  | 0 | 0 | 0   | 0   | 0 | 0  | 0   | 0 | 0  | 0 | 0   |
| 460 | 0 | 0 | 0 | 0  | 0  | 0 | 0 | 0   | 0   | 0 | 0  | 0   | 0 | 0  | 0 | 0   |
| 463 | 0 | 0 | 0 | 0  | 0  | 0 | 0 | 0   | 0   | 0 | 0  | 0   | 0 | 0  | 0 | 0   |
| 464 | 0 | 0 | 0 | 0  | 0  | 0 | 0 | 0   | 0   | 0 | 0  | 0   | 0 | 0  | 0 | 0   |
| 465 | 0 | 0 | 0 | 0  | 0  | 0 | 0 | 0   | 0   | 0 | 0  | 0   | 0 | 0  | 0 | 0   |
| 466 | 0 | 0 | 0 | 0  | 0  | 0 | 0 | 0   | 0   | 0 | 0  | 0   | 0 | 0  | 0 | 0   |
| 469 | 0 | 0 | 0 | 0  | 0  | 0 | 0 | 0   | 0   | 0 | 0  | 0   | 0 | 0  | 0 | 0   |
| 470 | 0 | 0 | 0 | 0  | 0  | 0 | 0 | 0   | 2   | 0 | 0  | 0   | 0 | 0  | 0 | 0   |
| 472 | 0 | 0 | 0 | 0  | 0  | 0 | 0 | 0   | 0   | 0 | 0  | 0   | 0 | 0  | 0 | 0   |
| 473 | 0 | 0 | 0 | 0  | 0  | 0 | 0 | 0   | 0   | 0 | 0  | 0   | 0 | 0  | 0 | 0   |
| 474 | 0 | 0 | 0 | 0  | 0  | 0 | 0 | 0   | 0   | 0 | 15 | 0   | 0 | 0  | 0 | 0   |

















|      |   |   |   |     |    |   |   |     |    |   |   |     |    |     |     |     |
|------|---|---|---|-----|----|---|---|-----|----|---|---|-----|----|-----|-----|-----|
| 1277 | 0 | 0 | 0 | 0   | 0  | 0 | 0 | 0   | 0  | 0 | 0 | 0   | 0  | 0   | 0   | 0   |
| 1278 | 0 | 0 | 0 | 0   | 0  | 0 | 0 | 0   | 0  | 0 | 0 | 0   | 0  | 0   | 0   | 0   |
| 1279 | 0 | 0 | 0 | 0   | 0  | 0 | 0 | 0   | 0  | 0 | 0 | 0   | 0  | 0   | 0   | 0   |
| 1280 | 0 | 0 | 0 | 0   | 0  | 0 | 0 | 0   | 0  | 0 | 0 | 0   | 0  | 0   | 0   | 0   |
| 1282 | 0 | 0 | 0 | 0   | 0  | 0 | 0 | 0   | 0  | 0 | 0 | 1   | 0  | 0   | 0   | 0   |
| 1284 | 0 | 0 | 0 | 0   | 0  | 0 | 0 | 0   | 0  | 0 | 0 | 0   | 0  | 0   | 0   | 0   |
| 1285 | 0 | 0 | 0 | 0   | 0  | 0 | 0 | 0   | 0  | 0 | 0 | 0   | 0  | 0   | 0   | 0   |
| 1286 | 0 | 0 | 0 | 0   | 0  | 0 | 0 | 0   | 0  | 0 | 0 | 0   | 0  | 0   | 0   | 0   |
| 1287 | 0 | 0 | 0 | 0   | 0  | 0 | 0 | 0   | 0  | 0 | 0 | 0   | 0  | 0   | 0   | 0   |
| 1288 | 0 | 0 | 0 | 0   | 0  | 0 | 0 | 0   | 0  | 0 | 0 | 0   | 0  | 0   | 0   | 0   |
| 1289 | 0 | 0 | 0 | 0   | 0  | 0 | 0 | 0   | 0  | 0 | 0 | 1   | 0  | 0   | 0   | 0   |
| 1290 | 0 | 0 | 0 | 0   | 0  | 1 | 0 | 0   | 0  | 0 | 0 | 0   | 0  | 0   | 0   | 0   |
| 1291 | 0 | 0 | 0 | 0   | 0  | 0 | 0 | 0   | 0  | 0 | 0 | 0   | 0  | 1   | 0   | 0   |
| 1292 | 0 | 0 | 0 | 0   | 0  | 0 | 0 | 0   | 0  | 0 | 0 | 0   | 0  | 1   | 0   | 0   |
| 1293 | 0 | 0 | 0 | 0   | 0  | 0 | 0 | 0   | 7  | 0 | 0 | 0   | 0  | 175 | 0   | 0   |
| 1294 | 0 | 3 | 0 | 0   | 0  | 0 | 0 | 0   | 0  | 0 | 0 | 0   | 0  | 0   | 0   | 0   |
| 1295 | 0 | 0 | 0 | 0   | 0  | 0 | 0 | 0   | 0  | 0 | 0 | 0   | 0  | 0   | 0   | 0   |
| 1298 | 0 | 0 | 0 | 0   | 0  | 0 | 0 | 0   | 0  | 0 | 0 | 0   | 0  | 0   | 0   | 0   |
| 1299 | 0 | 0 | 0 | 0   | 0  | 0 | 0 | 0   | 0  | 0 | 0 | 0   | 0  | 1   | 0   | 0   |
| 1301 | 0 | 0 | 0 | 0   | 0  | 0 | 0 | 0   | 0  | 0 | 0 | 0   | 0  | 0   | 0   | 0   |
| 1303 | 0 | 0 | 0 | 0   | 0  | 0 | 0 | 0   | 0  | 0 | 0 | 0   | 0  | 0   | 0   | 0   |
| 1305 | 0 | 0 | 0 | 0   | 0  | 0 | 0 | 0   | 0  | 0 | 0 | 0   | 0  | 0   | 0   | 0   |
| 1306 | 0 | 1 | 0 | 0   | 0  | 0 | 6 | 16  | 49 | 0 | 0 | 33  | 0  | 11  | 0   | 0   |
| 1307 | 0 | 1 | 0 | 0   | 0  | 0 | 0 | 0   | 0  | 0 | 0 | 0   | 0  | 0   | 0   | 0   |
| 1309 | 0 | 0 | 0 | 0   | 0  | 0 | 0 | 0   | 0  | 0 | 0 | 0   | 0  | 0   | 0   | 0   |
| 1310 | 0 | 0 | 0 | 0   | 0  | 0 | 0 | 0   | 0  | 0 | 0 | 0   | 0  | 0   | 0   | 0   |
| 1312 | 5 | 0 | 0 | 0   | 0  | 0 | 0 | 0   | 0  | 0 | 0 | 0   | 0  | 0   | 0   | 0   |
| 1313 | 0 | 0 | 0 | 0   | 0  | 0 | 0 | 0   | 0  | 0 | 0 | 0   | 0  | 0   | 0   | 0   |
| 1319 | 0 | 0 | 0 | 0   | 0  | 0 | 0 | 0   | 0  | 0 | 0 | 0   | 0  | 0   | 0   | 0   |
| 1321 | 0 | 0 | 0 | 0   | 0  | 0 | 0 | 0   | 0  | 0 | 0 | 0   | 0  | 0   | 0   | 0   |
| 1322 | 0 | 0 | 0 | 0   | 0  | 0 | 0 | 0   | 0  | 0 | 0 | 0   | 0  | 0   | 0   | 0   |
| 1326 | 0 | 0 | 0 | 0   | 0  | 0 | 0 | 0   | 0  | 0 | 0 | 0   | 0  | 0   | 0   | 0   |
| 1327 | 0 | 0 | 0 | 0   | 0  | 0 | 0 | 0   | 0  | 0 | 0 | 0   | 0  | 0   | 0   | 0   |
| 1329 | 0 | 0 | 0 | 0   | 0  | 0 | 0 | 0   | 0  | 0 | 0 | 0   | 0  | 0   | 0   | 0   |
| 1330 | 0 | 0 | 0 | 0   | 0  | 0 | 0 | 0   | 0  | 0 | 0 | 0   | 0  | 0   | 0   | 0   |
| 1331 | 0 | 0 | 0 | 0   | 0  | 0 | 0 | 0   | 0  | 0 | 0 | 0   | 0  | 0   | 0   | 0   |
| 1332 | 0 | 0 | 0 | 0   | 0  | 0 | 0 | 0   | 0  | 0 | 0 | 0   | 0  | 0   | 0   | 0   |
| 1334 | 0 | 0 | 0 | 0   | 0  | 0 | 0 | 0   | 0  | 0 | 0 | 0   | 0  | 0   | 0   | 0   |
| 1335 | 0 | 0 | 0 | 0   | 0  | 0 | 0 | 0   | 0  | 0 | 0 | 0   | 0  | 0   | 0   | 0   |
| 1336 | 0 | 0 | 0 | 0   | 0  | 0 | 0 | 0   | 0  | 0 | 0 | 0   | 0  | 0   | 0   | 0   |
| 1339 | 0 | 0 | 0 | 0   | 0  | 0 | 0 | 0   | 0  | 0 | 0 | 0   | 0  | 0   | 0   | 0   |
| 1340 | 0 | 0 | 0 | 0   | 0  | 0 | 0 | 87  | 0  | 0 | 0 | 109 | 0  | 0   | 0   | 0   |
| 1342 | 0 | 0 | 0 | 0   | 0  | 0 | 0 | 0   | 0  | 0 | 0 | 0   | 0  | 0   | 0   | 0   |
| 1343 | 0 | 0 | 0 | 0   | 0  | 0 | 0 | 0   | 0  | 0 | 0 | 0   | 0  | 0   | 0   | 0   |
| 1344 | 0 | 0 | 0 | 0   | 0  | 0 | 0 | 0   | 0  | 0 | 0 | 0   | 0  | 0   | 0   | 0   |
| 1346 | 0 | 0 | 0 | 0   | 0  | 0 | 0 | 0   | 0  | 0 | 0 | 0   | 0  | 0   | 0   | 0   |
| 1348 | 0 | 0 | 0 | 0   | 0  | 0 | 0 | 0   | 0  | 0 | 0 | 0   | 0  | 0   | 0   | 0   |
| 1349 | 0 | 0 | 0 | 0   | 1  | 0 | 0 | 0   | 0  | 0 | 0 | 0   | 0  | 5   | 0   | 0   |
| 1352 | 0 | 0 | 0 | 0   | 0  | 0 | 0 | 0   | 0  | 0 | 0 | 0   | 0  | 0   | 0   | 0   |
| 1353 | 0 | 0 | 0 | 0   | 0  | 0 | 0 | 0   | 0  | 0 | 0 | 0   | 0  | 0   | 0   | 0   |
| 1354 | 0 | 0 | 0 | 0   | 0  | 0 | 0 | 0   | 0  | 0 | 0 | 0   | 0  | 0   | 0   | 0   |
| 1356 | 0 | 0 | 0 | 0   | 0  | 0 | 0 | 0   | 0  | 0 | 0 | 0   | 0  | 0   | 0   | 0   |
| 1361 | 0 | 0 | 0 | 0   | 0  | 0 | 0 | 0   | 0  | 0 | 0 | 0   | 0  | 0   | 0   | 0   |
| 1362 | 0 | 0 | 0 | 0   | 0  | 0 | 0 | 0   | 0  | 0 | 0 | 0   | 0  | 0   | 0   | 0   |
| 1363 | 0 | 0 | 0 | 0   | 0  | 0 | 0 | 4   | 0  | 0 | 0 | 0   | 0  | 0   | 0   | 0   |
| 1364 | 0 | 0 | 0 | 0   | 0  | 0 | 0 | 0   | 0  | 0 | 0 | 0   | 0  | 0   | 0   | 0   |
| 1365 | 0 | 0 | 0 | 0   | 0  | 0 | 0 | 0   | 0  | 0 | 0 | 0   | 0  | 0   | 0   | 0   |
| 1366 | 0 | 0 | 0 | 0   | 0  | 0 | 0 | 0   | 0  | 0 | 0 | 0   | 0  | 0   | 0   | 0   |
| 1367 | 0 | 0 | 0 | 0   | 0  | 0 | 0 | 0   | 0  | 0 | 0 | 0   | 0  | 0   | 0   | 0   |
| 1368 | 0 | 0 | 0 | 0   | 0  | 0 | 0 | 0   | 0  | 0 | 0 | 0   | 0  | 0   | 0   | 0   |
| 1371 | 0 | 0 | 0 | 0   | 0  | 0 | 0 | 0   | 0  | 0 | 0 | 0   | 0  | 0   | 0   | 0   |
| 1373 | 0 | 0 | 0 | 0   | 0  | 0 | 0 | 0   | 0  | 0 | 0 | 0   | 0  | 0   | 0   | 0   |
| 1374 | 0 | 0 | 0 | 0   | 0  | 0 | 0 | 0   | 0  | 0 | 0 | 0   | 0  | 0   | 0   | 0   |
| 1381 | 0 | 0 | 0 | 0   | 0  | 0 | 0 | 0   | 0  | 0 | 0 | 0   | 0  | 10  | 0   | 0   |
| 1383 | 0 | 0 | 0 | 0   | 0  | 0 | 0 | 0   | 0  | 0 | 0 | 0   | 0  | 0   | 0   | 0   |
| 1384 | 0 | 0 | 0 | 0   | 0  | 0 | 0 | 0   | 0  | 0 | 1 | 0   | 0  | 0   | 24  | 0   |
| 1385 | 0 | 0 | 0 | 0   | 0  | 0 | 0 | 0   | 0  | 0 | 0 | 0   | 0  | 0   | 0   | 0   |
| 1388 | 0 | 0 | 0 | 0   | 0  | 0 | 0 | 0   | 0  | 0 | 0 | 0   | 0  | 0   | 0   | 0   |
| 1389 | 0 | 0 | 0 | 0   | 0  | 0 | 0 | 0   | 0  | 0 | 0 | 0   | 0  | 0   | 0   | 0   |
| 1391 | 0 | 0 | 0 | 0   | 0  | 0 | 0 | 0   | 0  | 0 | 0 | 0   | 0  | 0   | 0   | 0   |
| 1392 | 1 | 1 | 0 | 186 | 44 | 0 | 0 | 113 | 72 | 7 | 0 | 81  | 21 | 111 | 109 | 514 |
| 1393 | 0 | 0 | 0 | 0   | 0  | 0 | 0 | 0   | 0  | 0 | 0 | 1   | 0  | 0   | 0   | 0   |







|      |   |   |   |     |    |   |   |    |    |    |   |     |   |     |    |   |
|------|---|---|---|-----|----|---|---|----|----|----|---|-----|---|-----|----|---|
| 1732 | 0 | 0 | 0 | 0   | 0  | 0 | 0 | 0  | 0  | 0  | 0 | 0   | 0 | 0   | 0  | 0 |
| 1735 | 0 | 0 | 0 | 0   | 0  | 0 | 0 | 0  | 0  | 0  | 0 | 0   | 0 | 0   | 0  | 0 |
| 1736 | 0 | 0 | 0 | 0   | 0  | 0 | 0 | 0  | 0  | 0  | 0 | 0   | 0 | 0   | 0  | 0 |
| 1738 | 0 | 0 | 0 | 0   | 0  | 0 | 0 | 0  | 0  | 0  | 0 | 0   | 0 | 0   | 0  | 0 |
| 1740 | 0 | 0 | 0 | 0   | 0  | 0 | 0 | 0  | 0  | 0  | 0 | 0   | 0 | 0   | 0  | 0 |
| 1741 | 0 | 0 | 0 | 0   | 0  | 0 | 0 | 0  | 0  | 0  | 0 | 0   | 0 | 0   | 0  | 0 |
| 1742 | 0 | 0 | 0 | 0   | 0  | 0 | 0 | 0  | 0  | 0  | 0 | 0   | 0 | 0   | 0  | 0 |
| 1743 | 0 | 0 | 0 | 0   | 0  | 0 | 0 | 0  | 0  | 0  | 0 | 0   | 0 | 0   | 0  | 0 |
| 1744 | 0 | 0 | 0 | 0   | 0  | 0 | 0 | 0  | 0  | 0  | 0 | 0   | 0 | 0   | 0  | 0 |
| 1745 | 0 | 0 | 0 | 0   | 0  | 0 | 0 | 0  | 0  | 0  | 0 | 0   | 0 | 11  | 0  | 0 |
| 1747 | 0 | 0 | 0 | 0   | 0  | 0 | 0 | 0  | 0  | 0  | 0 | 0   | 0 | 0   | 0  | 0 |
| 1749 | 0 | 0 | 0 | 0   | 0  | 0 | 0 | 0  | 0  | 0  | 0 | 0   | 0 | 0   | 0  | 0 |
| 1752 | 0 | 0 | 0 | 0   | 1  | 0 | 0 | 0  | 0  | 0  | 0 | 0   | 0 | 0   | 0  | 0 |
| 1753 | 0 | 0 | 0 | 0   | 0  | 0 | 0 | 0  | 0  | 0  | 0 | 0   | 0 | 0   | 0  | 0 |
| 1758 | 0 | 0 | 0 | 0   | 0  | 0 | 0 | 0  | 0  | 0  | 0 | 0   | 0 | 0   | 0  | 0 |
| 1759 | 0 | 0 | 0 | 0   | 0  | 0 | 0 | 0  | 0  | 0  | 0 | 0   | 0 | 0   | 0  | 0 |
| 1762 | 0 | 0 | 0 | 0   | 0  | 0 | 0 | 0  | 0  | 0  | 0 | 0   | 0 | 0   | 0  | 0 |
| 1763 | 0 | 0 | 0 | 0   | 0  | 0 | 0 | 0  | 0  | 0  | 0 | 0   | 0 | 0   | 0  | 0 |
| 1764 | 0 | 0 | 0 | 0   | 0  | 0 | 0 | 0  | 0  | 0  | 0 | 0   | 0 | 80  | 0  | 2 |
| 1765 | 0 | 0 | 0 | 0   | 0  | 0 | 0 | 0  | 0  | 0  | 0 | 0   | 0 | 0   | 0  | 0 |
| 1766 | 0 | 0 | 0 | 0   | 0  | 0 | 0 | 0  | 0  | 0  | 0 | 0   | 0 | 0   | 0  | 0 |
| 1767 | 0 | 0 | 0 | 0   | 0  | 0 | 0 | 0  | 0  | 0  | 0 | 0   | 0 | 0   | 0  | 0 |
| 1768 | 0 | 0 | 0 | 0   | 0  | 0 | 0 | 0  | 0  | 0  | 0 | 0   | 0 | 7   | 0  | 0 |
| 1772 | 0 | 0 | 0 | 0   | 0  | 0 | 0 | 0  | 0  | 0  | 0 | 0   | 0 | 0   | 0  | 0 |
| 1775 | 0 | 0 | 0 | 0   | 0  | 0 | 0 | 0  | 0  | 0  | 0 | 0   | 0 | 0   | 0  | 0 |
| 1776 | 0 | 0 | 0 | 0   | 0  | 0 | 0 | 0  | 0  | 0  | 0 | 0   | 0 | 0   | 0  | 0 |
| 1777 | 0 | 0 | 0 | 0   | 0  | 0 | 0 | 0  | 0  | 0  | 0 | 0   | 0 | 0   | 0  | 0 |
| 1778 | 0 | 0 | 0 | 0   | 0  | 0 | 0 | 0  | 0  | 0  | 0 | 0   | 0 | 0   | 0  | 0 |
| 1780 | 0 | 0 | 0 | 0   | 0  | 0 | 0 | 0  | 0  | 0  | 0 | 0   | 0 | 0   | 0  | 0 |
| 1781 | 0 | 0 | 0 | 0   | 0  | 0 | 0 | 0  | 0  | 0  | 0 | 0   | 0 | 0   | 0  | 0 |
| 1783 | 0 | 0 | 0 | 0   | 0  | 0 | 0 | 0  | 0  | 0  | 0 | 0   | 0 | 0   | 0  | 0 |
| 1784 | 0 | 0 | 0 | 0   | 0  | 0 | 0 | 0  | 0  | 0  | 0 | 0   | 0 | 0   | 0  | 0 |
| 1786 | 0 | 0 | 0 | 0   | 0  | 0 | 0 | 0  | 0  | 0  | 0 | 0   | 0 | 0   | 0  | 0 |
| 1791 | 3 | 2 | 0 | 0   | 77 | 0 | 0 | 42 | 68 | 5  | 0 | 353 | 1 | 0   | 2  | 0 |
| 1793 | 0 | 0 | 0 | 0   | 0  | 0 | 0 | 0  | 0  | 0  | 0 | 0   | 0 | 0   | 0  | 0 |
| 1794 | 0 | 0 | 0 | 0   | 0  | 0 | 0 | 0  | 0  | 0  | 0 | 0   | 0 | 73  | 0  | 0 |
| 1795 | 0 | 0 | 0 | 0   | 0  | 0 | 0 | 0  | 0  | 0  | 0 | 0   | 0 | 0   | 0  | 0 |
| 1796 | 0 | 0 | 0 | 0   | 0  | 0 | 0 | 0  | 0  | 0  | 0 | 0   | 0 | 0   | 0  | 0 |
| 1797 | 0 | 0 | 0 | 0   | 0  | 0 | 0 | 0  | 0  | 0  | 0 | 0   | 0 | 0   | 0  | 0 |
| 1799 | 0 | 0 | 0 | 0   | 0  | 0 | 0 | 0  | 0  | 0  | 0 | 0   | 0 | 0   | 0  | 0 |
| 1800 | 0 | 0 | 0 | 0   | 0  | 0 | 0 | 0  | 0  | 0  | 0 | 0   | 0 | 0   | 0  | 0 |
| 1806 | 0 | 0 | 0 | 0   | 0  | 0 | 0 | 0  | 0  | 0  | 0 | 0   | 0 | 0   | 0  | 0 |
| 1807 | 0 | 0 | 0 | 0   | 0  | 0 | 0 | 0  | 0  | 0  | 0 | 0   | 0 | 0   | 0  | 0 |
| 1810 | 0 | 8 | 0 | 159 | 0  | 0 | 0 | 94 | 48 | 25 | 0 | 46  | 0 | 27  | 14 | 0 |
| 1811 | 0 | 0 | 0 | 0   | 0  | 0 | 0 | 0  | 0  | 0  | 0 | 0   | 0 | 0   | 0  | 0 |
| 1812 | 0 | 0 | 0 | 0   | 0  | 0 | 0 | 0  | 0  | 0  | 0 | 0   | 0 | 0   | 0  | 0 |
| 1814 | 0 | 0 | 0 | 0   | 0  | 0 | 0 | 0  | 0  | 0  | 0 | 0   | 0 | 0   | 0  | 0 |
| 1817 | 0 | 0 | 0 | 0   | 0  | 1 | 0 | 0  | 6  | 0  | 0 | 0   | 0 | 0   | 0  | 0 |
| 1822 | 0 | 0 | 0 | 0   | 0  | 0 | 0 | 0  | 0  | 0  | 0 | 0   | 0 | 0   | 0  | 0 |
| 1824 | 0 | 0 | 0 | 0   | 0  | 0 | 0 | 0  | 0  | 0  | 0 | 0   | 0 | 0   | 0  | 0 |
| 1826 | 0 | 0 | 0 | 0   | 0  | 0 | 0 | 0  | 0  | 0  | 0 | 0   | 0 | 104 | 0  | 0 |
| 1827 | 0 | 0 | 0 | 0   | 0  | 0 | 0 | 0  | 0  | 0  | 0 | 0   | 0 | 0   | 0  | 0 |
| 1828 | 0 | 0 | 0 | 0   | 0  | 0 | 0 | 0  | 0  | 0  | 0 | 0   | 0 | 0   | 0  | 0 |
| 1829 | 0 | 0 | 0 | 0   | 0  | 0 | 0 | 0  | 0  | 0  | 0 | 0   | 0 | 0   | 0  | 0 |
| 1831 | 0 | 0 | 0 | 0   | 0  | 0 | 0 | 0  | 0  | 0  | 0 | 0   | 0 | 0   | 0  | 0 |
| 1832 | 0 | 0 | 0 | 0   | 0  | 0 | 0 | 0  | 0  | 0  | 0 | 0   | 0 | 0   | 0  | 0 |
| 1834 | 0 | 0 | 0 | 0   | 0  | 0 | 0 | 0  | 0  | 0  | 0 | 0   | 0 | 0   | 0  | 0 |
| 1836 | 0 | 0 | 0 | 0   | 0  | 0 | 0 | 0  | 0  | 0  | 0 | 0   | 0 | 0   | 0  | 0 |
| 1837 | 0 | 0 | 0 | 0   | 0  | 0 | 0 | 0  | 0  | 0  | 0 | 0   | 0 | 0   | 0  | 0 |
| 1838 | 0 | 0 | 0 | 0   | 0  | 0 | 0 | 0  | 0  | 0  | 0 | 0   | 0 | 0   | 0  | 0 |
| 1842 | 0 | 0 | 0 | 0   | 0  | 0 | 0 | 0  | 0  | 0  | 0 | 0   | 0 | 0   | 0  | 0 |
| 1843 | 0 | 0 | 0 | 0   | 0  | 0 | 0 | 0  | 0  | 0  | 0 | 0   | 0 | 0   | 0  | 0 |
| 1844 | 0 | 0 | 0 | 0   | 0  | 0 | 0 | 0  | 0  | 0  | 0 | 0   | 0 | 0   | 0  | 0 |
| 1845 | 0 | 0 | 0 | 0   | 7  | 0 | 0 | 0  | 0  | 0  | 0 | 0   | 0 | 0   | 0  | 0 |
| 1846 | 0 | 0 | 0 | 0   | 0  | 0 | 0 | 0  | 1  | 0  | 0 | 0   | 0 | 0   | 0  | 0 |
| 1847 | 0 | 0 | 0 | 0   | 0  | 0 | 0 | 0  | 0  | 0  | 0 | 0   | 0 | 0   | 0  | 0 |
| 1851 | 0 | 0 | 0 | 0   | 0  | 0 | 0 | 0  | 0  | 0  | 0 | 0   | 0 | 0   | 0  | 0 |
| 1852 | 0 | 0 | 0 | 0   | 0  | 0 | 0 | 0  | 0  | 0  | 0 | 0   | 0 | 0   | 0  | 0 |
| 1853 | 0 | 0 | 0 | 0   | 0  | 0 | 0 | 0  | 0  | 0  | 0 | 0   | 0 | 0   | 0  | 0 |
| 1854 | 0 | 0 | 0 | 0   | 0  | 0 | 0 | 0  | 0  | 0  | 0 | 0   | 0 | 0   | 0  | 0 |
| 1857 | 0 | 0 | 0 | 0   | 0  | 0 | 0 | 0  | 0  | 0  | 0 | 0   | 0 | 0   | 0  | 0 |
| 1858 | 0 | 0 | 0 | 0   | 0  | 0 | 0 | 0  | 1  | 0  | 0 | 0   | 0 | 0   | 0  | 0 |





|      |       |     |   |    |     |   |   |   |    |   |    |    |   |     |   |     |
|------|-------|-----|---|----|-----|---|---|---|----|---|----|----|---|-----|---|-----|
| 1967 | 0     | 0   | 0 | 0  | 0   | 0 | 0 | 0 | 0  | 0 | 0  | 0  | 0 | 0   | 0 | 0   |
| 1968 | 0     | 0   | 0 | 0  | 0   | 0 | 0 | 0 | 2  | 0 | 0  | 13 | 0 | 0   | 0 | 0   |
| 1970 | 0     | 0   | 0 | 0  | 0   | 0 | 0 | 0 | 0  | 0 | 0  | 0  | 0 | 0   | 0 | 0   |
| 1971 | 0     | 0   | 0 | 0  | 0   | 0 | 0 | 0 | 0  | 0 | 0  | 0  | 0 | 0   | 0 | 0   |
| 1972 | 0     | 0   | 0 | 0  | 0   | 0 | 0 | 0 | 0  | 0 | 0  | 0  | 0 | 0   | 0 | 0   |
| 1974 | 0     | 0   | 0 | 0  | 0   | 0 | 0 | 0 | 0  | 0 | 0  | 0  | 0 | 0   | 0 | 0   |
| 1975 | 0     | 0   | 0 | 0  | 0   | 0 | 0 | 0 | 0  | 0 | 0  | 0  | 0 | 0   | 0 | 0   |
| 1977 | 0     | 0   | 0 | 0  | 0   | 0 | 0 | 0 | 0  | 0 | 0  | 0  | 0 | 0   | 0 | 0   |
| 1978 | 0     | 0   | 0 | 0  | 0   | 0 | 0 | 0 | 0  | 0 | 0  | 0  | 0 | 0   | 0 | 0   |
| 1979 | 0     | 0   | 0 | 0  | 0   | 0 | 0 | 0 | 0  | 0 | 0  | 0  | 0 | 0   | 0 | 0   |
| 1980 | 0     | 4   | 0 | 0  | 0   | 0 | 0 | 0 | 0  | 0 | 0  | 0  | 0 | 1   | 1 | 0   |
| 1982 | 0     | 0   | 0 | 45 | 269 | 0 | 0 | 9 | 6  | 0 | 0  | 0  | 0 | 15  | 0 | 240 |
| 1983 | 0     | 0   | 0 | 0  | 0   | 0 | 0 | 0 | 0  | 0 | 0  | 0  | 0 | 0   | 0 | 0   |
| 1984 | 0     | 0   | 0 | 0  | 0   | 0 | 0 | 0 | 0  | 0 | 0  | 0  | 0 | 0   | 0 | 0   |
| 1987 | 0     | 0   | 0 | 0  | 0   | 0 | 0 | 0 | 0  | 0 | 0  | 0  | 0 | 0   | 0 | 0   |
| 1988 | 0     | 0   | 0 | 0  | 0   | 0 | 0 | 0 | 0  | 0 | 0  | 0  | 0 | 0   | 0 | 0   |
| 1989 | 0     | 0   | 0 | 0  | 0   | 0 | 0 | 0 | 0  | 0 | 0  | 0  | 0 | 0   | 0 | 0   |
| 1990 | 0     | 0   | 0 | 0  | 0   | 0 | 0 | 0 | 0  | 0 | 0  | 0  | 0 | 0   | 0 | 0   |
| 1991 | 0     | 0   | 0 | 0  | 0   | 0 | 0 | 0 | 0  | 3 | 0  | 0  | 0 | 0   | 0 | 0   |
| 1994 | 0     | 0   | 0 | 0  | 0   | 0 | 0 | 0 | 0  | 0 | 0  | 0  | 0 | 0   | 0 | 0   |
| 1995 | 0     | 0   | 0 | 0  | 0   | 0 | 0 | 0 | 2  | 0 | 0  | 0  | 0 | 0   | 0 | 0   |
| 1996 | 0     | 0   | 0 | 0  | 0   | 0 | 0 | 0 | 0  | 0 | 0  | 0  | 0 | 0   | 0 | 0   |
| 1998 | 0     | 0   | 0 | 0  | 0   | 0 | 0 | 0 | 0  | 0 | 0  | 0  | 0 | 0   | 0 | 0   |
| 1999 | 14497 | 274 | 0 | 0  | 0   | 0 | 0 | 0 | 0  | 0 | 11 | 0  | 0 | 493 | 1 | 0   |
| 2002 | 0     | 0   | 0 | 0  | 0   | 0 | 0 | 0 | 0  | 0 | 0  | 0  | 0 | 0   | 0 | 0   |
| 2003 | 0     | 0   | 0 | 0  | 0   | 0 | 0 | 0 | 1  | 0 | 0  | 0  | 0 | 0   | 0 | 0   |
| 2004 | 0     | 0   | 0 | 0  | 0   | 0 | 0 | 0 | 0  | 0 | 0  | 0  | 0 | 0   | 0 | 0   |
| 2006 | 0     | 0   | 0 | 0  | 0   | 0 | 0 | 0 | 4  | 0 | 0  | 0  | 0 | 0   | 0 | 0   |
| 2008 | 0     | 0   | 0 | 0  | 0   | 0 | 0 | 0 | 0  | 0 | 0  | 0  | 0 | 0   | 0 | 0   |
| 2009 | 0     | 0   | 0 | 0  | 0   | 0 | 0 | 0 | 0  | 0 | 0  | 0  | 0 | 0   | 0 | 0   |
| 2011 | 0     | 0   | 0 | 0  | 0   | 0 | 0 | 0 | 0  | 0 | 0  | 1  | 0 | 0   | 0 | 0   |
| 2012 | 0     | 0   | 0 | 0  | 0   | 0 | 0 | 0 | 0  | 0 | 0  | 1  | 0 | 0   | 0 | 0   |
| 2013 | 0     | 0   | 0 | 0  | 0   | 0 | 0 | 0 | 0  | 0 | 0  | 0  | 0 | 0   | 0 | 0   |
| 2014 | 1     | 0   | 0 | 0  | 320 | 0 | 0 | 3 | 0  | 0 | 0  | 12 | 0 | 3   | 0 | 1   |
| 2018 | 0     | 0   | 0 | 0  | 0   | 0 | 0 | 0 | 0  | 0 | 0  | 0  | 0 | 0   | 0 | 0   |
| 2019 | 0     | 0   | 0 | 0  | 0   | 0 | 0 | 0 | 0  | 0 | 0  | 0  | 0 | 0   | 0 | 0   |
| 2020 | 0     | 0   | 0 | 0  | 0   | 0 | 0 | 0 | 0  | 0 | 0  | 0  | 0 | 9   | 0 | 0   |
| 2024 | 0     | 0   | 0 | 0  | 0   | 0 | 0 | 0 | 0  | 0 | 0  | 0  | 0 | 0   | 0 | 0   |
| 2026 | 0     | 0   | 0 | 0  | 0   | 0 | 0 | 0 | 0  | 0 | 0  | 0  | 0 | 0   | 0 | 0   |
| 2027 | 0     | 0   | 0 | 0  | 0   | 0 | 0 | 0 | 0  | 0 | 0  | 0  | 0 | 0   | 0 | 0   |
| 2030 | 0     | 0   | 0 | 0  | 0   | 0 | 0 | 0 | 1  | 0 | 0  | 0  | 0 | 0   | 0 | 0   |
| 2033 | 0     | 0   | 0 | 0  | 0   | 0 | 0 | 0 | 0  | 0 | 0  | 0  | 0 | 0   | 0 | 0   |
| 2034 | 0     | 1   | 0 | 0  | 0   | 0 | 0 | 0 | 0  | 0 | 0  | 0  | 0 | 0   | 0 | 0   |
| 2035 | 0     | 0   | 0 | 0  | 0   | 0 | 0 | 0 | 0  | 0 | 0  | 0  | 0 | 0   | 0 | 0   |
| 2036 | 0     | 0   | 0 | 0  | 0   | 0 | 0 | 0 | 0  | 0 | 0  | 0  | 0 | 0   | 0 | 0   |
| 2038 | 0     | 0   | 0 | 0  | 0   | 0 | 0 | 0 | 0  | 0 | 0  | 0  | 0 | 0   | 0 | 0   |
| 2040 | 0     | 0   | 0 | 0  | 0   | 0 | 0 | 0 | 0  | 0 | 0  | 0  | 0 | 0   | 0 | 0   |
| 2041 | 0     | 0   | 0 | 0  | 0   | 0 | 0 | 0 | 0  | 0 | 0  | 0  | 0 | 0   | 0 | 0   |
| 2042 | 0     | 0   | 0 | 0  | 0   | 0 | 0 | 0 | 0  | 0 | 0  | 0  | 0 | 0   | 0 | 0   |
| 2045 | 0     | 0   | 0 | 0  | 0   | 0 | 0 | 0 | 0  | 0 | 0  | 0  | 0 | 0   | 0 | 0   |
| 2046 | 0     | 0   | 0 | 0  | 0   | 0 | 0 | 0 | 0  | 0 | 0  | 0  | 0 | 0   | 0 | 0   |
| 2049 | 0     | 0   | 0 | 0  | 0   | 0 | 0 | 0 | 0  | 0 | 0  | 0  | 0 | 0   | 0 | 0   |
| 2052 | 0     | 0   | 0 | 0  | 0   | 0 | 0 | 0 | 0  | 0 | 0  | 0  | 0 | 0   | 0 | 0   |
| 2053 | 0     | 0   | 0 | 0  | 0   | 0 | 0 | 0 | 0  | 0 | 0  | 0  | 0 | 0   | 0 | 0   |
| 2056 | 0     | 0   | 0 | 0  | 0   | 0 | 0 | 0 | 39 | 0 | 0  | 2  | 0 | 32  | 0 | 0   |
| 2058 | 0     | 0   | 0 | 0  | 0   | 0 | 0 | 0 | 0  | 0 | 0  | 0  | 0 | 0   | 0 | 0   |
| 2060 | 0     | 0   | 0 | 0  | 0   | 0 | 0 | 0 | 0  | 0 | 0  | 0  | 0 | 0   | 0 | 0   |
| 2061 | 0     | 0   | 0 | 0  | 0   | 0 | 0 | 0 | 0  | 0 | 0  | 5  | 0 | 0   | 0 | 0   |
| 2062 | 0     | 0   | 0 | 0  | 0   | 0 | 0 | 0 | 0  | 0 | 0  | 0  | 0 | 0   | 0 | 0   |
| 2065 | 0     | 0   | 0 | 0  | 0   | 0 | 0 | 0 | 0  | 0 | 0  | 0  | 0 | 0   | 0 | 0   |
| 2067 | 0     | 0   | 0 | 0  | 0   | 0 | 0 | 0 | 0  | 0 | 0  | 0  | 0 | 0   | 0 | 0   |
| 2068 | 0     | 0   | 0 | 0  | 0   | 0 | 0 | 0 | 0  | 0 | 0  | 0  | 0 | 0   | 0 | 0   |
| 2069 | 0     | 0   | 0 | 0  | 0   | 0 | 0 | 0 | 1  | 0 | 0  | 0  | 0 | 0   | 0 | 0   |
| 2071 | 0     | 0   | 0 | 0  | 0   | 0 | 0 | 0 | 0  | 0 | 0  | 0  | 0 | 0   | 0 | 0   |
| 2074 | 0     | 0   | 0 | 0  | 0   | 0 | 0 | 0 | 0  | 0 | 0  | 0  | 0 | 0   | 0 | 0   |
| 2075 | 0     | 0   | 0 | 0  | 0   | 0 | 0 | 0 | 0  | 0 | 0  | 0  | 0 | 10  | 0 | 0   |
| 2078 | 0     | 0   | 0 | 0  | 0   | 0 | 0 | 0 | 0  | 0 | 0  | 0  | 0 | 0   | 0 | 0   |
| 2079 | 0     | 0   | 0 | 0  | 0   | 0 | 0 | 0 | 0  | 0 | 0  | 0  | 0 | 0   | 0 | 0   |
| 2081 | 0     | 0   | 0 | 33 | 0   | 0 | 0 | 0 | 6  | 0 | 0  | 0  | 0 | 0   | 0 | 0   |
