# Supplementary material
Source: PubMed Central journal article supplement (PMC3480531)
Supplement: supp_186.6.536_Charlson_ODS_table_E3.pdf [file supp_186.6.536_Charlson_ODS_table_E3.pdf]

Consensus Lineage

Eukaryota;Fungi;Basidiomycota;Agaricomycetes  
Eukaryota;Fungi;Basidiomycota;Tremellomycetes  
Eukaryota;Fungi;Ascomycota;Eurotiomycetes;Eurotiales;Trichocomaceae;Penicillium  
Eukaryota;Fungi;Ascomycota;Eurotiomycetes;Eurotiales;Trichocomaceae;Penicillium  
Eukaryota;Fungi;Ascomycota;Sordariomycetes;Sordariales;Sordariaceae  
Eukaryota;Fungi;Basidiomycota;Agaricomycetes;Cantharellales;Ceratobasidiaceae;Ceratobasidium  
Eukaryota;Fungi;Ascomycota;Acremonium;Acremonium implicatum  
Eukaryota;Fungi;Basidiomycota;Agaricomycetes;Polyporales;Coriolaceae;Trametes;Trametes versicolor  
All BLAST hits were filtered for low quality.  
Eukaryota;Fungi;Basidiomycota;Agaricomycetes;Polyporales;Polyporaceae;Skeletocutis;Skeletocutis sp. NMM-2009  
Eukaryota;Fungi;Ascomycota;Sordariomycetes;Diaporthales;Diaporthaceae  
Eukaryota;Fungi;Basidiomycota;Agaricomycetes;Agaricales;Tricholomataceae;Gymnopus  
Eukaryota;Fungi;Ascomycota;Dothideomycetes;Capnodiales;Mycosphaerellaceae;Zymoseptoria;Zymoseptoria tritici  
Eukaryota;Fungi;Ascomycota;Dothideomycetes;Pleosporales;Pleosporaceae;Dendryphion  
Eukaryota;Fungi;Ascomycota;Coniosporium;Coniosporium uncinatum  
Eukaryota;Fungi  
Eukaryota;Fungi;Basidiomycota;Tremellomycetes;Cystofilobasidiales;Mrakiella;Mrakiella aquatica  
Eukaryota;Fungi  
Eukaryota;Fungi;Ascomycota;Saccharomycetes;Saccharomycetales;Candida;Candida tropicalis  
Eukaryota;Fungi;Ascomycota;Saccharomycetes;Saccharomycetales  
Eukaryota;Fungi;Ascomycota;Sordariomycetes;Hypocreales;Clavicipitaceae;Claviceps;Claviceps purpurea  
Eukaryota;Metazoa;Chordata;Mammalia;Primates  
Abundance of low coverage hits: possible chimera  
Eukaryota;Fungi;Basidiomycota;Agaricomycetes;Polyporales;Polyporaceae;Ischnoderma;Ischnoderma benzoinum  
Eukaryota;Fungi;Ascomycota;Sordariomycetes;Diaporthales;Gnomoniaceae;Ophiognomonia;Ophiognomonia setacea  
Eukaryota;Fungi;Ascomycota;Sordariomycetes;Coniochaetales;Coniochaetales;Lecythophora  
Eukaryota;Fungi;Basidiomycota;Agaricomycetes;Hymenochaetales;Hymenochaetales  
Eukaryota;Fungi;Basidiomycota;Ustilaginomycetes;Ustilaginales  
Eukaryota;Fungi;Basidiomycota;Tremellomycetes;Tremellales;Tremellaceae;Filobasidiella  
Eukaryota;Fungi  
Eukaryota;Fungi;Ascomycota;Saccharomycetes;Saccharomycetales;Candida;Candida metapsilosis  
Eukaryota;Fungi;Ascomycota;Eurotiomycetes;Eurotiales;Trichocomaceae  
Eukaryota;Fungi;Basidiomycota;Tremellomycetes;Filobasidiales;Cryptococcus  
Eukaryota;Fungi;Basidiomycota;Tremellomycetes  
Eukaryota;Fungi  
Eukaryota;Fungi;Basidiomycota;Agaricomycetes;Polyporales;Polyporaceae;Trichaptum;Trichaptum bifforme  
Eukaryota;Fungi  
Eukaryota;Fungi;Ascomycota;Sordariomycetes;Microascales  
Eukaryota;Fungi  
Eukaryota;Fungi;Basidiomycota;Tremellomycetes;Cystofilobasidiales  
Eukaryota;Fungi;Ascomycota;Eurotiomycetes;Eurotiales;Trichocomaceae;Trichocomaceae sp. LM127  
Eukaryota;Fungi;Ascomycota;Sordariomycetes;Xylariales  
Eukaryota;Fungi;Basidiomycota;Tremellomycetes;Tremellales;Tremellaceae;Tremella  
Eukaryota;Fungi;Ascomycota;Dothideomycetes;Pleosporales;Pleosporaceae  
Eukaryota;Fungi;Basidiomycota;Agaricomycetes;Agaricales;Pleurotales;Pleurotales  
Eukaryota;Fungi;Ascomycota;Eurotiomycetes;Eurotiales;Trichocomaceae  
Eukaryota;Metazoa;Chordata;Mammalia;Primates;Hominidae;Homo;Homo sapiens  
Eukaryota;Fungi;Ascomycota;Eurotiomycetes;Eurotiales;Trichocomaceae;Penicillium  
Eukaryota;Fungi;Basidiomycota;Agaricomycetes;Russulales;Peniophoraceae;Peniophora  
Eukaryota;Fungi;Basidiomycota;Agaricomycetes;Polyporales;Coriolaceae  
Abundance of low coverage hits: possible chimera  
Eukaryota;Fungi;Ascomycota;Eurotiomycetes;Eurotiales;Trichocomaceae;Thermoascus;Thermoascus crustaceus  
Eukaryota;Fungi;Basidiomycota;Agaricomycetes;Polyporales;Coriolaceae  
Eukaryota;Fungi;Ascomycota;Eurotiomycetes;Eurotiales;Trichocomaceae;Penicillium  
Eukaryota;Fungi;Basidiomycota;Agaricomycetes;Russulales;Peniophoraceae;Peniophora  
Eukaryota;Fungi  
Eukaryota;Fungi;Ascomycota;Eurotiomycetes;Eurotiales;Trichocomaceae;Penicillium  
Eukaryota;Fungi;Ascomycota;Dothideomycetes;Capnodiales  
Abundance of low coverage hits: possible chimera  
Eukaryota;Fungi;Ascomycota;Eurotiomycetes;Eurotiales;Trichocomaceae;Byssochlamys;Byssochlamys spectabilis  
Eukaryota;Fungi;Ascomycota;Dothideomycetes;Capnodiales;Teratosphaeriaceae  
Eukaryota;Fungi

Eukaryota;Fungi;Basidiomycota;Tremellomycetes;Tremellales;Trichosporon;Trichosporon asahii  
Eukaryota;Fungi  
Eukaryota;Fungi  
Eukaryota;Fungi;Ascomycota;Saccharomycetes;Saccharomycetales;Saccharomycetaceae;Kodamaea;Kodamaea ohmeri  
Eukaryota;Fungi;Ascomycota;Sordariomycetes;Diaporthales  
Eukaryota;Fungi;Ascomycota;Dothideomycetes;Capnodiales;Davidiellaceae;Cladosporium  
Eukaryota;Fungi;Basidiomycota;Agaricomycetes;Hymenochaetales;Hymenochaetaceae  
Eukaryota;Fungi  
Eukaryota;Fungi;Basidiomycota;Exobasidiomycetes;Malasseziales;Malasseziaceae;Malassezia;Malassezia sympodialis  
Eukaryota;Fungi;Ascomycota;Eurotiomycetes;Eurotiales;Trichocomaceae;Aspergillus  
Eukaryota;Fungi;Basidiomycota;Tremellomycetes;Tremellales;Trichosporon  
Eukaryota;Fungi;Ascomycota  
Eukaryota;Fungi;Ascomycota;Dothideomycetes;Pleosporales;Pleosporaceae  
Eukaryota;Fungi;Ascomycota;Dothideomycetes;Capnodiales;Mycosphaerellaceae;Mycosphaerella  
Abundance of low coverage hits: possible chimera  
Eukaryota;Viridiplantae;Streptophyta;Brassicales;Brassicaceae;Sinapis;Sinapis alba  
Eukaryota;Fungi  
Eukaryota;Fungi;Basidiomycota;Agaricomycetes;Cantharellales;Ceratobasidiaceae  
Eukaryota;Fungi  
Eukaryota;Fungi;Ascomycota;Sordariomycetes;Diaporthales  
Eukaryota;Fungi;Ascomycota;Sordariomycetes;Hypocreales;Bionectriaceae  
Eukaryota;Fungi;Ascomycota;Eurotiomycetes;Eurotiales;Trichocomaceae;Sagenomella;Sagenomella sp. HMH-2007a  
All BLAST hits were filtered for low quality.  
Eukaryota;Fungi  
Eukaryota;Fungi  
Eukaryota;Fungi;Ascomycota;Saccharomycetes;Saccharomycetales  
Eukaryota;Fungi  
Eukaryota;Fungi;Basidiomycota;Agaricomycetes;Agaricales;Phyalacriaceae;Phyalacria  
Eukaryota;Fungi;Ascomycota;Dothideomycetes;Pleosporales;Pleosporaceae  
Bacteria;Actinobacteria;Actinomycetales;Micrococccaceae;Rothia;Rothia mucilaginoso  
Eukaryota;Fungi  
Eukaryota;Fungi;Basidiomycota;Sporidiobolales  
Eukaryota;Fungi  
Abundance of low coverage hits: possible chimera  
Eukaryota;Fungi;Ascomycota;Eurotiomycetes;Eurotiales;Trichocomaceae;Aspergillus  
Eukaryota;Fungi;Basidiomycota;Tremellomycetes  
Eukaryota;Fungi  
Eukaryota;Fungi;Basidiomycota;Agaricomycetes  
Eukaryota;Fungi  
Eukaryota;Fungi;Basidiomycota;Tremellomycetes;Cystofilobasidiales  
Eukaryota;Fungi;Basidiomycota;Exobasidiomycetes;Malasseziales;Malasseziaceae;Malassezia;Malassezia japonica  
Eukaryota;Fungi;Basidiomycota;Agaricomycetes;Agaricales;Tricholomataceae;Gymnopus;Gymnopus melanopus  
Eukaryota;Fungi;Ascomycota;Saccharomycetes;Saccharomycetales;Candida  
Abundance of low coverage hits: possible chimera  
Eukaryota;Fungi  
Eukaryota;Fungi;Ascomycota;Sordariomycetes;Glomerellales;Glomerellaceae;Glomerella;Glomerella acutata  
Eukaryota;Fungi;Basidiomycota;Wallemiomycetes;Wallemiales;Wallemia;Wallemia sebi  
All BLAST hits were filtered for low quality.  
Eukaryota;Fungi;Basidiomycota;Agaricomycetes  
Eukaryota;Fungi;Basidiomycota;Agaricomycetes;Agaricales;Psathyrellaceae;Psathyrella  
Eukaryota;Fungi;Ascomycota;Eurotiomycetes;Eurotiales;Trichocomaceae;Aspergillus  
Eukaryota;Fungi;Ascomycota  
Eukaryota;Fungi;Basidiomycota;Agaricomycetes;Corticiales;Corticaceae;Phlebia  
Eukaryota;Fungi;Basidiomycota;Agaricomycetes;Polyporales;Coriolaceae;Trametes;Trametes hirsuta  
Eukaryota;Fungi  
Eukaryota;Metazoa;Chordata;Mammalia;Primates;Hominidae;Homo;Homo sapiens  
Eukaryota;Fungi  
Eukaryota;Fungi;Basidiomycota;Agaricomycetes  
Eukaryota;Fungi  
No hits found in database  
Eukaryota;Fungi;Ascomycota;Dothideomycetes;Pleosporales;Phaeosphaeriaceae  
Eukaryota;Fungi;Basidiomycota;Sporidiobolales;Sporidiobolus;Sporidiobolus salmonicolor  
Eukaryota;Fungi;Ascomycota;Dothideomycetes;Capnodiales;Teratosphaeriaceae  
Eukaryota;Fungi;Ascomycota;Dothideomycetes;Capnodiales;Davidiellaceae  
Eukaryota;Fungi

Eukaryota;Fungi;Ascomycota;Sordariomycetes;Glomerellales;Plectosphaerellaceae;Plectosphaerella

Eukaryota;Fungi;Ascomycota;Saccharomycetes;Saccharomycetales;Saccharomycetaceae;Saccharomyces;Saccharomyces cerevisiae

Eukaryota;Fungi;Ascomycota;Sordariomycetes;Hypocreales;Myrothecium

Eukaryota;Fungi;Ascomycota;Eurotiomycetes;Chaetothyriales;Herpotrichiellaceae;Exophiala

Eukaryota;Fungi;Ascomycota;Sordariomycetes;Sordariales

Eukaryota;Metazoa;Arthropoda;Insecta;Isoptera;Rhinotermitidae;Reticulitermes;Reticulitermes flavipes

Eukaryota;Fungi;Ascomycota;Dothideomycetes;Pleosporales;Pleosporales sp. MU-2009-2

Eukaryota;Fungi;Ascomycota;Leotiomycetes;Helotiales;Sclerotiniaceae

Eukaryota;Fungi;Basidiomycota;Agaricomycetes;Russulales;Meruliaceae;Ceriporiopsis;Ceriporiopsis subvermispora

Eukaryota;Fungi;Basidiomycota;Agaricomycetes;Polyporales;Polyporaceae;Skeletocutis;Skeletocutis nivea

Eukaryota;Fungi;Basidiomycota;Agaricomycetes;Polyporales;Ganodermataceae

Eukaryota

Eukaryota;Fungi

Eukaryota;Fungi

Eukaryota;Fungi

Eukaryota;Fungi;Basidiomycota;Agaricomycetes

Eukaryota;Fungi

Eukaryota;Fungi;Basidiomycota;Agaricomycetes;Polyporales;Polyporaceae;Pycnoporellus

Eukaryota;Fungi;Ascomycota;Thermomyces;Thermomyces lanuginosus

Eukaryota;Fungi;Basidiomycota;Agaricomycetes;Auriculariales;Exidiaceae;Exidia;Exidia pithya

Eukaryota;Fungi;Basidiomycota;Ustilaginomycetes;Ustilaginales;Ustilaginaceae;Pseudozyma;Pseudozyma flocculosa

Eukaryota;Fungi

Bacteria;Actinobacteria;Actinomycetales;Micrococcaceae;Rothia;Rothia mucilaginoso

Eukaryota;Fungi;Basidiomycota;Exobasidiomycetes;Malasseziales;Malasseziaceae;Malassezia;Malassezia furfur

Eukaryota;Viridiplantae;Streptophyta;Rosales;Cannabaceae;Cannabis;Cannabis sativa

All BLAST hits were filtered for low quality.

Eukaryota;Fungi

Eukaryota;Fungi;Basidiomycota;Agaricomycetes;Hymenochaetales;Hymenochaetaeaceae

Eukaryota;Fungi

Eukaryota;Metazoa;Chordata;Mammalia;Primates;Hominidae;Homo;Homo sapiens

Eukaryota;Fungi;Basidiomycota;Agaricomycetes;Cantharellales;Ceratobasidiaceae

Eukaryota;Fungi

Eukaryota;Fungi;Basidiomycota;Agaricomycetes;Hymenochaetales;Hymenochaetaeaceae;Fomitiporia

Eukaryota;Fungi;Ascomycota;Eurotiomycetes;Eurotiales;Trichocomaceae

No hits found in database

Eukaryota;Fungi;Ascomycota;Saccharomycetes;Saccharomycetales;Dipodascaceae;Galactomyces;Galactomyces geotrichum

Eukaryota;Metazoa;Chordata;Mammalia;Primates;Hominidae;Homo;Homo sapiens

Eukaryota;Fungi;Basidiomycota;Agaricomycetes;Agaricales;Schizophyllaceae;Schizophyllum;Schizophyllum commune

Eukaryota;Fungi;Ascomycota;Dothideomycetes;Capnodiales

Eukaryota;Fungi;Ascomycota;Eurotiomycetes;Chaetothyriales;Herpotrichiellaceae;Exophiala

Eukaryota

Eukaryota;Fungi;Ascomycota;Sordariomycetes;Hypocreales;Bionectriaceae

Eukaryota;Fungi

Eukaryota;Fungi;Ascomycota;Dothideomycetes;Capnodiales;Teratosphaeriaceae;Teratosphaeria;Teratosphaeria microspora

No hits found in database

Eukaryota;Fungi;Basidiomycota;Tremellomycetes;Cystofilobasidiales;Cystofilobasidiaceae;Mrakia

Eukaryota;Fungi;Ascomycota;Eurotiomycetes;Eurotiales;Trichocomaceae;Aspergillus;Aspergillus penicillioides

Eukaryota;Fungi;Ascomycota;Eurotiomycetes;Eurotiales;Trichocomaceae;Aspergillus

All BLAST hits were filtered for low quality.

Eukaryota;Fungi;Ascomycota;Dothideomycetes;Capnodiales;Davidiellaceae;Cladosporium

Eukaryota;Fungi;Ascomycota;Sordariomycetes;Hypocreales;Ophiocordycipitaceae;Purpureocillium;Purpureocillium lilacinum

Eukaryota;Fungi;Ascomycota;Dothideomycetes;Pleosporales;Pleosporaceae;Alternaria

Eukaryota;Fungi;Basidiomycota;Sporidiobolales;Sporidiobolus;Sporidiobolus ruineniae

Eukaryota;Fungi

Eukaryota;Fungi;Basidiomycota;Agaricomycetes;Russulales;Stereaceae;Stereum

Eukaryota;Fungi;Basidiomycota;Erythrobasidiales;Rhodotorula

Eukaryota;Fungi;Basidiomycota;Agaricomycetes;Polyporales;Irpex;Irpex lacteus

Eukaryota;Fungi;Ascomycota;Saccharomycetes;Saccharomycetales;Candida;Candida dubliniensis

Eukaryota;Fungi;Ascomycota;Dothideomycetes;Capnodiales;Mycosphaerellaceae;Mycosphaerella

Eukaryota;Fungi;Ascomycota;Eurotiomycetes;Eurotiales;Trichocomaceae;uncultured Eurotium

Eukaryota;Fungi

Eukaryota;Fungi;Ascomycota  
Eukaryota;Fungi  
Eukaryota;Fungi;Ascomycota;Sordariomycetes  
Eukaryota;Fungi;Basidiomycota;Agaricomycetes;Corticiales;Corticaceae  
Eukaryota;Metazoa;Chordata;Mammalia;Primates;Hominidae;Homo;Homo sapiens  
Eukaryota;Fungi;Basidiomycota;Agaricomycetes;Agaricales;Tricholomataceae;Pseudobaeospora  
Eukaryota;Fungi;Ascomycota;Eurotiomycetes;Eurotiales;Trichocomaceae;Penicillium  
Eukaryota;Fungi;Basidiomycota;Agaricomycetes;Agaricales;Lycoperdaceae  
Eukaryota;Fungi  
All BLAST hits were filtered for low quality.  
Eukaryota;Fungi;Ascomycota;Eurotiomycetes;Chaetothyriales;Herpotrichiellaceae;Veronaea;Veronaea botryosa  
Eukaryota;Fungi;Ascomycota;Saccharomycetes;Saccharomycetales;Candida  
Eukaryota;Fungi;Basidiomycota;Exobasidiomycetes;Malasseziales;uncultured Malasseziales  
Eukaryota;Fungi;Ascomycota;Saccharomycetes;Saccharomycetales;Dipodasceae;Galactomyces;Galactomyces geotrichum  
Eukaryota;Fungi;Basidiomycota;Agaricomycetes;Atheliales;Atheliaceae;Athelia;cf. Athelia sp. 2 AJMH-2010  
Eukaryota;Fungi;Ascomycota;Sordariomycetes;Hypocreales;Clavicipitaceae  
Eukaryota;Fungi  
Eukaryota;Fungi;Ascomycota  
Eukaryota;Fungi;Ascomycota;Sordariomycetes;Hypocreales  
Eukaryota;Fungi;Basidiomycota;Agaricostilbomycetes;Kondoa;Kondoa malvinella  
Eukaryota;Fungi;Basidiomycota;Agaricomycetes;Corticiales;Corticaceae;Phanerochaete;Phanerochaete sordida  
Eukaryota;Fungi;Ascomycota;Eurotiomycetes;Eurotiales;Trichocomaceae;Penicillium  
Eukaryota;Fungi;Basidiomycota;Agaricomycetes;Corticiales;Corticaceae;Sistotrema;Sistotrema sernanderi  
Eukaryota;Fungi  
Eukaryota;Fungi;Basidiomycota  
Eukaryota;Fungi;Basidiomycota;Agaricomycetes;Polyporales;Coriolaceae  
Eukaryota;Metazoa;Chordata;Mammalia;Primates;Hominidae;Homo;Homo sapiens  
Eukaryota;Fungi;Basidiomycota;Agaricomycetes  
Eukaryota;Fungi;Ascomycota;Eurotiomycetes;Eurotiales;Trichocomaceae;Byssochlamys;Byssochlamys nivea  
Eukaryota;Fungi;Basidiomycota;Agaricomycetes;Agaricales;Physalacriaceae;Armillaria;Armillaria mellea  
All BLAST hits were filtered for low quality.  
All BLAST hits were filtered for low quality.  
Eukaryota;Fungi;Basidiomycota;Agaricomycetes;Agaricales;Physalacriaceae;Armillaria  
No hits found in database  
Eukaryota;Fungi;Ascomycota;Dothideomycetes;Pleosporales  
Eukaryota;Fungi;Basidiomycota;Tremellomycetes  
Eukaryota;Fungi;Basidiomycota;Tremellomycetes;Filobasidiales;Cryptococcus  
Eukaryota;Fungi;Ascomycota;Eurotiomycetes;Eurotiales;Trichocomaceae;Penicillium  
Eukaryota;Fungi;Basidiomycota;Agaricomycetes;Corticiales;Corticaceae  
Eukaryota;Fungi;Ascomycota  
Eukaryota;Fungi  
Eukaryota;Fungi  
Eukaryota;Fungi;Basidiomycota;Agaricomycetes  
Eukaryota;Fungi;Basidiomycota;Agaricomycetes;Corticiales;Corticaceae;Hyphoderma  
Eukaryota;Fungi;Ascomycota;Dothideomycetes;Epicoccum;Epicoccum nigrum  
Eukaryota;Fungi;Ascomycota;Eurotiomycetes;Eurotiales;Elaphomycetaceae;Xeromyces;Xeromyces bisporus  
Eukaryota;Fungi;Ascomycota;Sordariomycetes;Hypocreales;Nectriaceae;Gibberella  
Eukaryota;Fungi;Basidiomycota;Agaricomycetes;Corticiales;Corticaceae  
Eukaryota;Fungi;Ascomycota  
Eukaryota;Fungi;Ascomycota;Leotiomycetes;Helotiales;Hyaloscyphaceae  
Eukaryota;Fungi;Ascomycota;Sordariomycetes;Hypocreales;Sarcocladium;Sarcocladium glaucum  
Eukaryota;Fungi;Ascomycota;Dothideomycetes;Pleosporales;Pleosporaceae  
Eukaryota;Fungi;Ascomycota;Saccharomycetes;Saccharomycetales;Debaryomycetaceae;Debaryomyces  
Eukaryota;Fungi;Ascomycota;Dothideomycetes;Dothideales;Dothioraceae;Sydowia;Sydowia polyspora  
Eukaryota;Fungi  
Eukaryota;Fungi  
Eukaryota;Fungi;Ascomycota;Sordariomycetes;Hypocreales;Hypocreales sp. s011  
Eukaryota;Fungi;Ascomycota;Sordariomycetes;Magnaporthales;Magnaporthaceae;Phialophora  
Eukaryota;Fungi;Ascomycota  
Eukaryota;Fungi  
Eukaryota;Fungi;Basidiomycota;Agaricomycetes;Trechisporales;'Trechisporaceae';Trechispora;Trechispora farinacea  
Eukaryota;Fungi;Ascomycota;Leotiomycetes;Erysiphaceae;Podosphaera;Podosphaera fusca  
Eukaryota;Viridiplantae;Streptophyta;Fabales;Fabaceae;Glycine;Glycine max  
Eukaryota;Fungi;Ascomycota;Eurotiomycetes;Eurotiales;Trichocomaceae;Penicillium

Eukaryota;Fungi  
Eukaryota;Fungi;Ascomycota;Saccharomycetes;Saccharomycetales;Dipodascaceae  
Eukaryota;Fungi;Ascomycota;Sordariomycetes;Xylariales;Diatrypaceae;Eutypella  
Eukaryota;Fungi;Basidiomycota;Sporidiobolales;Rhodotorula;Rhodotorula mucilaginosa  
Eukaryota;Fungi;Ascomycota;Sordariomycetes;Hypocreales;Trichothecium;Trichothecium roseum  
Eukaryota;Fungi;Ascomycota;Dothideomycetes;Capnodiales;Davidiellaceae;Cladosporium  
Abundance of low coverage hits: possible chimera  
Eukaryota;Fungi;Basidiomycota;Agaricomycetes;Polyporales;Coriolaceae;Ceriporia;Ceriporia lacerata  
Eukaryota;Fungi;Ascomycota;Saccharomycetes  
Eukaryota;Fungi;Ascomycota;Sordariomycetes  
Eukaryota;Fungi;Ascomycota;Saccharomycetes;Saccharomycetales;Dipodascaceae;Geotrichum;Geotrichum sp. Po67  
Eukaryota;Fungi;Ascomycota;Sordariomycetes;Hypocreales;Hypocreaceae;Trichoderma  
Eukaryota;Metazoa;Chordata;Mammalia;Primates;Hominidae  
Eukaryota;Fungi;Ascomycota;Dothideomycetes;Pleosporales;Pleosporaceae  
Eukaryota;Metazoa;Chordata;Mammalia;Primates;Hominidae  
Eukaryota;Fungi;Ascomycota;Sordariomycetes;Xylariales;Diatrypaceae;Eutypella;Eutypella scoparia  
Eukaryota;Fungi  
Eukaryota;Fungi  
Eukaryota;Fungi;Ascomycota;Sordariomycetes;Microascales;Halosphaeriaceae;Periconia  
Eukaryota;Fungi;Basidiomycota;Agaricostilbomycetes;Sterigmatomyces  
Eukaryota;Fungi;Ascomycota;Dothideomycetes;Pleosporales;Pleosporaceae;Alternaria  
Eukaryota;Fungi;Ascomycota;Sordariomycetes;Hypocreales;Bionectriaceae  
Eukaryota  
Eukaryota;Fungi;Ascomycota;Sordariomycetes;Hypocreales;Stachybotrys  
Eukaryota;Fungi;Ascomycota;Eurotiomycetes;Eurotiales;Trichocomaceae;Aspergillus  
Eukaryota;Fungi;Basidiomycota;Tremellomycetes;Filobasidiales;Filobasidiaceae;Filobasidium;Filobasidium uniguttulatum  
Eukaryota;Fungi;Basidiomycota;Agaricomycetes;Agaricales;Psathyrellaceae;Coprinellus  
Eukaryota;Fungi  
Eukaryota;Fungi;Ascomycota;Eurotiomycetes;Eurotiales;Trichocomaceae;Aspergillus;Aspergillus fumigatus  
All BLAST hits were filtered for low quality.  
Eukaryota;Fungi;Ascomycota;Dothideomycetes;Capnodiales  
Eukaryota;Fungi  
Eukaryota;Fungi;Ascomycota;Eurotiomycetes;Eurotiales;Trichocomaceae;Penicillium  
Eukaryota;Fungi;Ascomycota;Dothideomycetes;Tubeufiaceae  
Eukaryota;Fungi;Basidiomycota;Tremellomycetes;Cystofilobasidiales;Cryptococcus;Cryptococcus macerans  
Eukaryota;Fungi;Basidiomycota;Sporidiobolales;Rhodosporidium;Rhodosporidium kratochvilovae  
Abundance of low coverage hits: possible chimera  
Eukaryota;Fungi  
Eukaryota;Fungi;Ascomycota;Eurotiomycetes;Eurotiales;Trichocomaceae;Penicillium  
Eukaryota;Fungi  
Eukaryota;Fungi  
Eukaryota;Fungi  
Eukaryota;Fungi;Basidiomycota;Tremellomycetes;Cystofilobasidiales;Cystofilobasidiaceae  
Eukaryota;Fungi;Ascomycota;Sordariomycetes;Hypocreales;Fusarium  
Eukaryota;Fungi  
Eukaryota;Fungi;Basidiomycota;Tremellomycetes;Filobasidiales;Filobasidiaceae;Filobasidium  
Eukaryota;Fungi;Ascomycota;Eurotiomycetes;Eurotiales;Trichocomaceae;Aspergillus;Aspergillus penicillioides  
Eukaryota;Fungi;Basidiomycota;Agaricomycetes;Boletales;Tapinellaceae;Pseudomerulius  
Eukaryota;Fungi;Basidiomycota;Agaricomycetes  
Eukaryota;Fungi;Basidiomycota;Agaricomycetes;Polyporales;Coriolaceae;Antrodia;Antrodia sinuosa  
Eukaryota;Fungi;Basidiomycota;Agaricomycetes;Agaricales  
Eukaryota;Viridiplantae;Streptophyta;Cucurbitales;Cucurbitaceae;Cucurbita;Cucurbita moschata  
Eukaryota;Fungi;Basidiomycota;Ustilaginomycetes;Ustilaginales;Ustilaginaceae;Sporisorium  
Eukaryota;Fungi  
Bacteria;Actinobacteria;Actinomycetales;Micrococcaceae;Rothia  
Eukaryota;Fungi  
Eukaryota;Fungi;Basidiomycota  
Eukaryota;Fungi;Ascomycota;Saccharomycetes;Saccharomycetales;Debaryomycetaceae;Meyerozyma;Meyerozyma guilliermondii  
Eukaryota;Fungi  
Abundance of low coverage hits: possible chimera  
Eukaryota;Fungi;Ascomycota;Saccharomycetes;Saccharomycetales;Dipodascaceae;Galactomyces  
Eukaryota;Fungi;Ascomycota;Lecanoromycetes;Lecanorales;Ramalinaceae;Bacidina;Bacidina chlorotricula  
Eukaryota;Fungi;Ascomycota;Eurotiomycetes;Eurotiales;Trichocomaceae;Penicillium  
Bacteria;Actinobacteria;Actinomycetales;Micrococcaceae;Rothia

Eukaryota;Fungi;Basidiomycota;Agaricomycetes;Polyporales  
Eukaryota;Fungi;Ascomycota;Saccharomycetes;Saccharomycetales  
Eukaryota;Metazoa;Chordata;Mammalia;Primates;Hominidae;Homo;Homo sapiens  
Eukaryota;Fungi;Ascomycota;Saccharomycetes;Saccharomycetales;Dipodascaceae;Galactomyces;Galactomyces  
geotrichum  
Eukaryota  
Eukaryota;Fungi  
Eukaryota;Fungi  
Eukaryota;Fungi;Basidiomycota;Agaricomycetes;Polyporales;Coriolaceae  
Eukaryota;Fungi;Ascomycota;Eurotiomycetes;Eurotiales;Trichocomaceae;Penicillium;Penicillium piceum  
Eukaryota;Fungi;Ascomycota;Saccharomycetes;Saccharomycetales;Dipodascaceae;Geotrichum;Geotrichum gigas  
Eukaryota;Fungi;Basidiomycota;Agaricomycetes;Agaricales;Psathyrellaceae;Coprinopsis  
Eukaryota;Fungi;Ascomycota;Sordariomycetes;Hypocreales  
Eukaryota;Fungi;Ascomycota;Saccharomycetes;Saccharomycetales;Candida;Candida palmiophila  
Eukaryota;Fungi;Basidiomycota;Agaricomycetes;Polyporales;Coriolaceae;Antrodia  
Eukaryota;Fungi;Basidiomycota;Tremellomycetes;Tremellales  
Eukaryota;Fungi;Ascomycota;Saccharomycetes;Saccharomycetales;Saccharomycetaceae;Cyberindera;Cyberindera  
jadinii  
Eukaryota;Fungi;Ascomycota;Sordariomycetes;Hypocreales;Fusarium  
Eukaryota;Fungi;Ascomycota;Saccharomycetes;Saccharomycetales;Debaryomycetaceae;Debaryomyces;Debaryomyces  
hanseni  
Eukaryota;Fungi;Basidiomycota;Agaricomycetes;Atheliales;Atheliaceae;Fibulorhizoctonia;Fibulorhizoctonia sp. TMB  
Eukaryota  
Eukaryota;Fungi;Basidiomycota;Agaricomycetes  
Eukaryota;Fungi  
Eukaryota;Fungi;Ascomycota;Saccharomycetes;Saccharomycetales;Saccharomycetaceae;Pichia;Pichia mexicana  
Eukaryota;Fungi;Ascomycota;Leotiomycetes;Erysiphaceae;Podosphaera  
Eukaryota;Fungi;Ascomycota;Eurotiomycetes;Eurotiales;Trichocomaceae;Eurotium  
Eukaryota;Fungi  
All BLAST hits were filtered for low quality.  
Eukaryota;Metazoa;Chordata;Mammalia;Primates;Hominidae;Homo;Homo sapiens  
Eukaryota;Fungi;Basidiomycota;Rhodotorula  
All BLAST hits were filtered for low quality.  
Eukaryota;Fungi;Basidiomycota  
Abundance of low coverage hits: possible chimera  
Eukaryota;Fungi;Ascomycota;Saccharomycetes;Saccharomycetales;Candida;Candida albicans  
Eukaryota;Viridiplantae;Streptophyta;Solanales;Solanales;Solanaceae;Solanum  
Eukaryota;Fungi;Ascomycota;Eurotiomycetes;Eurotiales;Trichocomaceae;Penicillium  
Eukaryota;Fungi;Basidiomycota;Agaricomycetes;Russulales;Peniophoraceae;Peniophora  
Eukaryota;Fungi;Ascomycota;Acremonium  
Eukaryota;Fungi;Basidiomycota;Agaricomycetes;Polyporales;Coriolaceae;Oxyporus  
Eukaryota;Fungi;Basidiomycota;Tremellomycetes;Filobasidiales;Filobasidiaceae;Filobasidium;Filobasidium capsuligenum  
Eukaryota;Fungi;Ascomycota;Sordariomycetes;Xylariales;Xylariaceae  
Eukaryota;Fungi;Basidiomycota;Sporidiobolales  
Eukaryota;Fungi  
Eukaryota;Fungi  
Eukaryota;Fungi;Ascomycota;Eurotiomycetes;Eurotiales;Trichocomaceae  
Eukaryota;Fungi;Ascomycota;Dothideomycetes;Capnodiales;Mycosphaerellaceae;uncultured Mycosphaerellaceae  
Eukaryota;Fungi;Basidiomycota;Agaricomycetes;Polyporales  
Eukaryota;Fungi;Ascomycota;Sordariomycetes;Magnaporthales;Magnaporthaceae  
Eukaryota;Fungi;Ascomycota;Dothideomycetes;Dothideales;Dothioraceae  
Eukaryota;Fungi  
No hits found in database  
Eukaryota;Fungi;Basidiomycota;Agaricomycetes;Polyporales  
Eukaryota;Fungi;Basidiomycota;Agaricomycetes;Auriculariales;Auriculariaceae;Auricularia;Auricularia polytricha  
Eukaryota;Fungi;Basidiomycota;Agaricomycetes;Agaricales;Psathyrellaceae;Coprinopsis;Coprinopsis cinerea  
Eukaryota;Fungi;Basidiomycota;Tremellomycetes  
Eukaryota;Fungi;Ascomycota;Dothideomycetes;Capnodiales;Teratosphaeriaceae;Teratosphaeria  
Eukaryota;Fungi;Ascomycota;Dothideomycetes;Botryosphaeriales;Botryosphaeriaceae;Lasiodiplodia  
All BLAST hits were filtered for low quality.  
Eukaryota;Fungi;Ascomycota;Sordariomycetes;Hypocreales  
Eukaryota;Fungi;Ascomycota;Eurotiomycetes;Eurotiales;Trichocomaceae;Aspergillus  
Eukaryota;Fungi;Ascomycota;Dothideomycetes;Pleosporales;Phaeosphaeriaceae;Phaeosphaeria
